# Supplementary material for: Factors associated with soil-transmitted helminths infection in Benin: Findings from the DeWorm3 study
Source: PubMed Central journal article supplement (PMC8396766; doi:10.1371/journal.pntd.0009646), 2021-08-17
Supplement: pntd.0009646.s007.pdf [file pntd.0009646.s007.pdf]

# PLOS Neglected Tropical Diseases

## Factors associated with soil-transmitted helminth infection in Benin: findings from the DeWorm3 study --Manuscript Draft--

|                           |                                                                                                                                                                                                                                                                                                                                                                                                                                                                                                                                                                                                                                                                                                                                                                                                                                                                                                                                                                                                                                                                                                                                                                                                                                                                                                                                                                                                                                                                                                                                                                                                                                                                                                                                                                                                                                                                                                                                                                                                                                                                                                                                                                                                                                                                                                                                                                                                                                                                                                                                                                                                                                                                                                                                                                                                                                                                                                                                                                                                                                                                                                                                                                                                                                                                                                                                                                                                                                                                                                                                                                                                                                                                                                                                                                                                                                                                                                                                                                                            |
|---------------------------|--------------------------------------------------------------------------------------------------------------------------------------------------------------------------------------------------------------------------------------------------------------------------------------------------------------------------------------------------------------------------------------------------------------------------------------------------------------------------------------------------------------------------------------------------------------------------------------------------------------------------------------------------------------------------------------------------------------------------------------------------------------------------------------------------------------------------------------------------------------------------------------------------------------------------------------------------------------------------------------------------------------------------------------------------------------------------------------------------------------------------------------------------------------------------------------------------------------------------------------------------------------------------------------------------------------------------------------------------------------------------------------------------------------------------------------------------------------------------------------------------------------------------------------------------------------------------------------------------------------------------------------------------------------------------------------------------------------------------------------------------------------------------------------------------------------------------------------------------------------------------------------------------------------------------------------------------------------------------------------------------------------------------------------------------------------------------------------------------------------------------------------------------------------------------------------------------------------------------------------------------------------------------------------------------------------------------------------------------------------------------------------------------------------------------------------------------------------------------------------------------------------------------------------------------------------------------------------------------------------------------------------------------------------------------------------------------------------------------------------------------------------------------------------------------------------------------------------------------------------------------------------------------------------------------------------------------------------------------------------------------------------------------------------------------------------------------------------------------------------------------------------------------------------------------------------------------------------------------------------------------------------------------------------------------------------------------------------------------------------------------------------------------------------------------------------------------------------------------------------------------------------------------------------------------------------------------------------------------------------------------------------------------------------------------------------------------------------------------------------------------------------------------------------------------------------------------------------------------------------------------------------------------------------------------------------------------------------------------------------------|
| <b>Manuscript Number:</b> | PNTD-D-20-02235                                                                                                                                                                                                                                                                                                                                                                                                                                                                                                                                                                                                                                                                                                                                                                                                                                                                                                                                                                                                                                                                                                                                                                                                                                                                                                                                                                                                                                                                                                                                                                                                                                                                                                                                                                                                                                                                                                                                                                                                                                                                                                                                                                                                                                                                                                                                                                                                                                                                                                                                                                                                                                                                                                                                                                                                                                                                                                                                                                                                                                                                                                                                                                                                                                                                                                                                                                                                                                                                                                                                                                                                                                                                                                                                                                                                                                                                                                                                                                            |
| <b>Full Title:</b>        | Factors associated with soil-transmitted helminth infection in Benin: findings from the DeWorm3 study                                                                                                                                                                                                                                                                                                                                                                                                                                                                                                                                                                                                                                                                                                                                                                                                                                                                                                                                                                                                                                                                                                                                                                                                                                                                                                                                                                                                                                                                                                                                                                                                                                                                                                                                                                                                                                                                                                                                                                                                                                                                                                                                                                                                                                                                                                                                                                                                                                                                                                                                                                                                                                                                                                                                                                                                                                                                                                                                                                                                                                                                                                                                                                                                                                                                                                                                                                                                                                                                                                                                                                                                                                                                                                                                                                                                                                                                                      |
| <b>Short Title:</b>       | Deworm3 study findings of factors associated with STH infection in Benin.                                                                                                                                                                                                                                                                                                                                                                                                                                                                                                                                                                                                                                                                                                                                                                                                                                                                                                                                                                                                                                                                                                                                                                                                                                                                                                                                                                                                                                                                                                                                                                                                                                                                                                                                                                                                                                                                                                                                                                                                                                                                                                                                                                                                                                                                                                                                                                                                                                                                                                                                                                                                                                                                                                                                                                                                                                                                                                                                                                                                                                                                                                                                                                                                                                                                                                                                                                                                                                                                                                                                                                                                                                                                                                                                                                                                                                                                                                                  |
| <b>Article Type:</b>      | Research Article                                                                                                                                                                                                                                                                                                                                                                                                                                                                                                                                                                                                                                                                                                                                                                                                                                                                                                                                                                                                                                                                                                                                                                                                                                                                                                                                                                                                                                                                                                                                                                                                                                                                                                                                                                                                                                                                                                                                                                                                                                                                                                                                                                                                                                                                                                                                                                                                                                                                                                                                                                                                                                                                                                                                                                                                                                                                                                                                                                                                                                                                                                                                                                                                                                                                                                                                                                                                                                                                                                                                                                                                                                                                                                                                                                                                                                                                                                                                                                           |
| <b>Keywords:</b>          | Soil Transmitted Helminths, prevalence, risk factor, DeWorm3, Comé, Benin                                                                                                                                                                                                                                                                                                                                                                                                                                                                                                                                                                                                                                                                                                                                                                                                                                                                                                                                                                                                                                                                                                                                                                                                                                                                                                                                                                                                                                                                                                                                                                                                                                                                                                                                                                                                                                                                                                                                                                                                                                                                                                                                                                                                                                                                                                                                                                                                                                                                                                                                                                                                                                                                                                                                                                                                                                                                                                                                                                                                                                                                                                                                                                                                                                                                                                                                                                                                                                                                                                                                                                                                                                                                                                                                                                                                                                                                                                                  |
| <b>Abstract:</b>          | <p>Background: Despite several years of school-based MDA implementation, STH remain an important public health problem in Benin, with a country-wide prevalence of 20% in 2015. The DeWorm3 study is designed to assess the feasibility of using community-based MDA with albendazole to interrupt the transmission of STH, through a series of cluster-randomized trials in Benin, India and Malawi. We used the pre-treatment baseline survey data to describe and analyze the factors associated with STH infection in Comé, the study site of the DeWorm3 project in Benin. These data will improve understanding of the challenges to be addressed in order to eliminate STH as a public health problem in Benin.</p> <p>Methods: Between March and April 2018, the prevalence of STH (hookworm spp., <i>Ascaris</i> and <i>Trichuris trichiura</i>) was assessed by Kato-Katz in stool samples collected from 6,153 residents in the community of Comé, Benin using a stratified random sampling procedure. A standardized survey questionnaire was used to collect information from individual households concerning factors potentially associated with the presence and intensity of STH infections in pre-school (PSAC, aged 1-4), school-aged children (SAC, aged 5-14) and adults (aged 15 and above). Multilevel mixed-effects models were used to assess associations between these factors and STH infection.</p> <p>Results: The overall prevalence of STH infection was 5.3%; 3.2% hookworm spp., 2.1% <i>Ascaris</i> and 0.1% <i>Trichuris</i>. Hookworm spp. were more prevalent in adults than in SAC (4.4% versus 2.0%, respectively; <math>p=0.0001</math>) and PSAC (4.4% versus 1.0%, respectively; <math>p&lt;0.0001</math>), whilst <i>Ascaris</i> was more prevalent in SAC than in adults (3.0% versus 1.7%, respectively; <math>p=0.004</math>). Being PSAC (adjusted Odds Ratio (aOR)=0.21, <math>p&lt;0.001</math>; adjusted Infection Intensity Ratio (aIIR)=0.10, <math>p&lt;0.001</math>) or SAC (aOR=0.49, <math>p=0.008</math>; aIIR=0.29, <math>p=0.01</math>), being a female (aOR=0.56, <math>p=0.004</math>; aIIR=0.32, <math>p=0.001</math>), and having received deworming treatment the previous year (aOR= 0.45, <math>p&lt;0.002</math>; aIIR=0.20, <math>p&lt;0.001</math>) were associated with a lower prevalence and intensity of hookworm infection. Lower income (lowest quintile: aOR= 5.03, <math>p&lt;0.001</math>, 2<sup>nd</sup> quintile aOR= 3.62, <math>p=0.001</math> and 3<sup>rd</sup> quintile aOR= 2.51, <math>p=0.02</math>), being a farmer (aOR= 1.79, <math>p=0.02</math>), medium population density (aOR= 2.59, <math>p=0.01</math>), and open defecation (aOR=0.48, <math>p=0.04</math>) were associated with a higher prevalence of hookworm infection. Lower education - no education, primary or secondary school- (aIIR=40.13, <math>p=0.01</math>; aIIR=30.92, <math>p=0.02</math>; aIIR=19.34, <math>p=0.04</math>, respectively), farming (aIIR=3.94, <math>p=0.002</math>), natural flooring (aIIR=0.23, <math>p=0.06</math>), peri-urban settings (aIIR=6.18, 95%CI 1.82 - 20.90, <math>p=0.003</math>), and unimproved water source more than 30 minutes from the household (aIIR= 13.47, <math>p=0.02</math>) were associated with a higher intensity of hookworm infection. Improved and unshared toilet was associated with lower intensity of hookworm infections (aIIR=0.23, <math>p=0.01</math>). SAC had a higher odds of <i>Ascaris</i> infection than adults (aOR= 2.0, <math>p=0.01</math>) and females had a lower odds of infection (aOR= 0.5, <math>p=0.02</math>).</p> <p>Conclusion:<br/>Hookworm spp. are the most prevalent STH in Comé, with a persistent reservoir in adults that is not addressed by current control measures based on school MDA. Expanding MDA to target adults and PSAC is necessary to substantially impact population prevalence, particularly for hookworm.</p> |

| Additional Information:                                                                                                                                                                                                                                                                                                                                                                                                                                                                                                                                                                                                                                                                                                                                                                                                                                                                                                                                                                                                                                                                                                                                                                                                                                                                                                                                                                    |                                                                                                                                                                                                                                                                                                                                                                                                                                                                                                                                                                                                                                                                                                                                                                                                  |
|--------------------------------------------------------------------------------------------------------------------------------------------------------------------------------------------------------------------------------------------------------------------------------------------------------------------------------------------------------------------------------------------------------------------------------------------------------------------------------------------------------------------------------------------------------------------------------------------------------------------------------------------------------------------------------------------------------------------------------------------------------------------------------------------------------------------------------------------------------------------------------------------------------------------------------------------------------------------------------------------------------------------------------------------------------------------------------------------------------------------------------------------------------------------------------------------------------------------------------------------------------------------------------------------------------------------------------------------------------------------------------------------|--------------------------------------------------------------------------------------------------------------------------------------------------------------------------------------------------------------------------------------------------------------------------------------------------------------------------------------------------------------------------------------------------------------------------------------------------------------------------------------------------------------------------------------------------------------------------------------------------------------------------------------------------------------------------------------------------------------------------------------------------------------------------------------------------|
| Question                                                                                                                                                                                                                                                                                                                                                                                                                                                                                                                                                                                                                                                                                                                                                                                                                                                                                                                                                                                                                                                                                                                                                                                                                                                                                                                                                                                   | Response                                                                                                                                                                                                                                                                                                                                                                                                                                                                                                                                                                                                                                                                                                                                                                                         |
| <p><b>Financial Disclosure</b></p> <p>Enter a financial disclosure statement that describes the sources of funding for the work included in this submission. Review the <a href="#">submission guidelines</a> for detailed requirements. View published research articles from <a href="#">PLOS NTDs</a> for specific examples.</p> <p>This statement is required for submission and <b>will appear in the published article</b> if the submission is accepted. Please make sure it is accurate.</p> <p><b>Unfunded studies</b></p> <p>Enter: <i>The author(s) received no specific funding for this work.</i></p> <p><b>Funded studies</b></p> <p>Enter a statement with the following details:</p> <ul style="list-style-type: none"> <li>• Initials of the authors who received each award</li> <li>• Grant numbers awarded to each author</li> <li>• The full name of each funder</li> <li>• URL of each funder website</li> <li>• Did the sponsors or funders play any role in the study design, data collection and analysis, decision to publish, or preparation of the manuscript?</li> <li>• <b>NO</b> - Include this sentence at the end of your statement: <i>The funders had no role in study design, data collection and analysis, decision to publish, or preparation of the manuscript.</i></li> <li>• <b>YES</b> - Specify the role(s) played.</li> </ul> <p>* typeset</p> | <p>JLW and TL received the DeWorm3 study funding from The Bill and Melinda Gates foundation (OPP1129535). <a href="https://www.gatesfoundation.org/">https://www.gatesfoundation.org/</a>. The funders had no role in study design, data collection and analysis, decision to publish, or preparation of the manuscript.</p> <p>EA is a PhD candidate at the University of Paris. His research is funded by DeWorm3 as a staff member of the Benin coordinating team, and by the French Research Institute for Sustainable Development (IRD) through the International Mixed Laboratory LMI CONS_HELM (helminth infections: treatments and consequences on health and development in the South).<br/><a href="https://www.ird.fr/benin/partenariat">https://www.ird.fr/benin/partenariat</a></p> |
| <b>Competing Interests</b>                                                                                                                                                                                                                                                                                                                                                                                                                                                                                                                                                                                                                                                                                                                                                                                                                                                                                                                                                                                                                                                                                                                                                                                                                                                                                                                                                                 | The authors have declared that no competing interests exist.                                                                                                                                                                                                                                                                                                                                                                                                                                                                                                                                                                                                                                                                                                                                     |

Use the instructions below to enter a competing interest statement for this submission. On behalf of all authors, disclose any [competing interests](#) that could be perceived to bias this work—acknowledging all financial support and any other relevant financial or non-financial competing interests.

This statement **will appear in the published article** if the submission is accepted. Please make sure it is accurate. View published research articles from [PLOS NTDs](#) for specific examples.

#### **NO authors have competing interests**

Enter: *The authors have declared that no competing interests exist.*

#### **Authors with competing interests**

Enter competing interest details beginning with this statement:

*I have read the journal's policy and the authors of this manuscript have the following competing interests: [insert competing interests here]*

\* typeset

#### **Data Availability**

Authors are required to make all data underlying the findings described fully available, without restriction, and from the

No - some restrictions will apply

time of publication. PLOS allows rare exceptions to address legal and ethical concerns. See the [PLOS Data Policy](#) and [FAQ](#) for detailed information.

A Data Availability Statement describing where the data can be found is required at submission. Your answers to this question constitute the Data Availability Statement and **will be published in the article**, if accepted.

**Important:** Stating 'data available on request from the author' is not sufficient. If your data are only available upon request, select 'No' for the first question and explain your exceptional situation in the text box.

Do the authors confirm that all data underlying the findings described in their manuscript are fully available without restriction?

**Describe where the data may be found in full sentences. If you are copying our sample text, replace any instances of XXX with the appropriate details.**

- If the data are **held or will be held in a public repository**, include URLs, accession numbers or DOIs. If this information will only be available after acceptance, indicate this by ticking the box below. For example: *All XXX files are available from the XXX database (accession number(s) XXX, XXX).*
- If the data are all contained **within the manuscript and/or Supporting Information files**, enter the following: *All relevant data are within the manuscript and its Supporting Information files.*

Data cannot be shared publicly because the study remains blinded. to outcome data. Data are available from the DeWorm3 Institutional Data Access Committee (contact via Barbra Richardson, barbrar@uw.edu) for researchers who meet the criteria for access to these data.

- If neither of these applies but you are able to provide **details of access elsewhere**, with or without limitations, please do so. For example:

*Data cannot be shared publicly because of [XXX]. Data are available from the XXX Institutional Data Access / Ethics Committee (contact via XXX) for researchers who meet the criteria for access to confidential data.*

*The data underlying the results presented in the study are available from (include the name of the third party and contact information or URL).*

- This text is appropriate if the data are owned by a third party and authors do not have permission to share the data.

\* typeset

Additional data availability information:

Tick here if the URLs/accession numbers/DOIs will be available only after acceptance of the manuscript for publication so that we can ensure their inclusion before publication.; Tick here if your circumstances are not covered by the questions above and you need the journal's help to make your data available.

# 1 Factors associated with soil-transmitted helminth infection in Benin: findings 2 from the DeWorm3 study

3

4

5 Euripide F G A Avokpaho<sup>1,2\*</sup>, Parfait Houngbégnon<sup>1</sup>, Manfred Accrombessi<sup>1</sup>, Eloic  
6 Atindegla<sup>1</sup>, Elodie Yard<sup>3</sup>, Arianna Rubin Means<sup>3,4</sup>, Timothy J Littlewood<sup>5</sup>, André  
7 Garcia<sup>6</sup>, Achille Massougbojji<sup>1</sup>, Sean Galagan<sup>4</sup>, Judd L Walson<sup>3,4</sup>, Gilles Cottrell<sup>6</sup>,  
8 Moudachirou Ibikounlé<sup>1,7\*</sup>, Kristjana Hrönn Ásbjörnsdóttir<sup>3,4\*</sup>, Adrian J F Luty<sup>6\*</sup>

9

10 ♠ Corresponding author: Euripide F G A Avokpaho, email:  
11 [euripideavokpaho@gmail.com](mailto:euripideavokpaho@gmail.com)

12

13 ♣ Joint co-last authors

14

15 Authors affiliations:

16• <sup>1</sup>Institut de Recherche Clinique du Bénin, Abomey-Calavi, Quartier Zopah Lot 641,  
17 04 BP 1114, Benin.

18• <sup>2</sup>Université de Paris, 12 Rue de l'École de Médecine, 75006 Paris, France

19• <sup>3</sup>DeWorm3, Division of Life Sciences, Natural History Museum, London, United  
20 Kingdom.

21• <sup>4</sup>Department of Global Health, University of Washington, Seattle, United States.

22• <sup>5</sup>Blantyre Institute for Community Outreach, Lions Sight First Eye Hospital, Blantyre,  
23 Malawi.

24• <sup>6</sup>Université de Paris, MERIT, IRD, F-75006 Paris, France

25• <sup>7</sup> Centre de Recherche pour la lutte contre les Maladies Infectieuses Tropicales  
26 (CReMIT), Université d'Abomey-Calavi, 01BP526, Cotonou, Bénin

27

28

29

## 30 Introduction

31 Soil-transmitted helminth (STH) infections are among the most common infections  
32 worldwide, affecting more than 1.5 billion of the poorest and most marginalized  
33 communities globally. (1) The most common STH species of humans include *Ascaris*  
34 *lumbricoides*, *Trichuris trichiura* and the hookworm species, *Necator americanus* and  
35 *Ancylostoma duodenale*. STH are transmitted by eggs present in human feces which  
36 in turn contaminate soil and water in areas with poor sanitation, conditions often found

37 in low-resource countries. (2) STH are widely distributed in tropical and subtropical  
38 areas, with the greatest numbers occurring in sub-Saharan Africa, the Americas, China  
39 and East Asia. (3) 

40  
41 The World Health Organization (WHO) considers STH a public health problem in areas  
42 where >1% of the at-risk population has moderate-to-heavy intensity infection — as  
43 measured by number of eggs per gram of stool diagnosed by stool examination (4).  
44 These moderate to high intensity helminth infections are associated with poor cognitive  
45 and motor outcomes in infants, as well as with anemia. (5–9) Pre-school children  
46 (PSAC), school age children (SAC) and women of reproductive age (WRA), including  
47 adolescent girls, pregnant women, lactating women, and non-pregnant and non-  
48 lactating women living in endemic areas, are at highest risk of morbidity due to STH.   
49 Clear policy and guidance are essential to support country-level efforts to expand  
50 routine deworming of WRA, and recent WHO publications have provided the  
51 necessary policy framework. (2,3)

52  
53 The WHO Neglected Tropical Disease (NTD) Roadmap and London Declaration have  
54 accelerated progress toward eliminating selected NTDs, including lymphatic filariasis  
55 and onchocerciasis, and formalized long-term disease-specific goals for other NTDs.  
56  (10) Global interest is shifting towards an elimination strategy for other NTDs, including  
57 the possibility of breaking the transmission of STH through community-wide mass drug  
58 administration (MDA). (11)

59  
60 In Benin, all major STH (~~hookworm sp., A. lumbricoides and T. trichiura~~)  are a  
61 recognized public health problem, with more than 50% of districts requiring MDA based  
62 on the results of a recent national mapping exercise that sampled stool from SAC.   
63 (12,13) In Comé District, this recent national mapping showed a prevalence of STH in  
64 ~~school-aged children~~ of 20%, despite multiple rounds of school-based MDA with  
65 albendazole in 2015 (coverage 59%), 2016 (coverage 78%) and 2017 (coverage 83%).  
66 (13) 

67  
68 In 2017, the DeWorm3 project (ClinicalTrials.gov Identifier NCT03014167) was  
69 initiated in Benin, and, in parallel, in India and Malawi. Using a cluster randomized  
70 controlled study design, the primary objective of the project is to determine whether

71 the provision of an enhanced (twice yearly) level of high-coverage MDA, targeting all  
72 age groups in a whole community over a 3-year period, can interrupt transmission of  
73 STH (11). Here we report analyses of baseline data from a longitudinal monitoring  
74 cohort randomly selected from the whole population involved in the trial in order to  
75 determine the demographic and other parameters potentially associated with the STH  
76 infections detected by microscopy using a standard Kato-Katz procedure.

77

## 78 **Materials and Methods**

### 79 **Study area and population**

80 The DeWorm3 trial in Benin is being conducted in the district of Comé. The study site  
81 selection was based on criteria reported previously. (14) Comé is located 70 km west  
82 of Cotonou in the Mono department, at latitude 6°24'N and longitude 1°53'E. The  
83 district covers an area of 153 km<sup>2</sup> with a population estimated at 79,989 inhabitants in  
84 the census of 2012, with an estimated yearly growth rate of 2.07%. (15) The district  
85 has five sub-districts (Central Comé, Akodéha, Oumako, Agatogbo and Ouèdèmè-  
86 Pedah) subdivided into 52 villages/areas or neighborhoods. The climate is sub-  
87 equatorial, tropical, alternating between two rainy seasons (April to July and  
88 September to November) and two dry seasons (December to March and August).  
89 Rainfall varies between 900 and 1,200 mm per year.

90

### 91 **Study design**

92 The protocol and aims of the DeWorm3 study have been published elsewhere. (11) A  
93 baseline census was conducted from January 8<sup>th</sup> to February 9<sup>th</sup>, 2018 followed by  
94 cluster demarcation. The geospatial locations of all households were mapped using  
95 ArcGIS (Redlands, CA), and the study area was divided into 40 clusters with between  
96 1,650 and 4,000 residents per cluster. From March 6<sup>th</sup> to April 5<sup>th</sup>, 2018, 6000  
97 individuals (150 individuals by cluster) were randomly selected to constitute a  
98 longitudinal monitoring cohort (LMC) participating in annual follow-up STH infection  
99 surveys over 5 years. The LMC was selected from the censused population using  
100 stratified random sampling of PSAC aged 1-4 years old, SAC aged 5-14 years old and  
101 adults aged 15 years old and above, at a ratio of 1:1:3. A sampling list of 150 individuals  
102 (i.e. 30 PSAC, 30 SAC and 90 adults) was initially generated and backup lists of 75



103 individuals were issued to replace participants who could not be located or refused to  
104 participate. LMC participants were interviewed and completed a more in-depth  
105 assessment of individual-level STH risk factors, including a survey of self-reported  
106 WASH access and use, history of deworming, and direct observation of WASH facilities  
107 and participants' use of footwear. Individuals participating in the LMC agreed to provide  
108 stool samples for immediate analysis using the Kato-Katz method (16) ~~annually for the~~  
109 ~~duration of the study.~~

## 111 Data collection

### 112 Kato-Katz data

113 Stool samples from LMC participants were collected by study staff and delivered to the  
114 laboratory within one hour. Samples were screened using the Kato-Katz technique,  
115 with results for each type of helminth (*A. lumbricoides*, *T. trichiura* and hookworm: *A.*  
116 *duodenale/N. americanus*) reported in eggs per gram (EPG). Two slides were prepared  
117 from each sample, and each slide was examined by two experienced lab technicians.  
118 A subset of 10% of slides was randomly selected for quality assurance by a laboratory  
119 manager. Prevalence was calculated both for individual STH types and cumulatively  
120 according to the following formulas:

121  
122 - The prevalence per STH type:

$$124 \quad p = \frac{\text{Number of samples where at least one egg of STH species is found}}{\text{total number of samples examined}} \times 100$$

126 - The cumulative STH prevalence:

$$127 \quad p = \frac{\text{Number of positive samples for one, two or three STH species}}{\text{total number of samples examined}} \times 100$$

129 In cases of co-infection, the sample was counted to calculate the cumulative  
130 prevalence, and prevalence and intensity assessed separately for each species. The  
131 parasite intensity was calculated from a Kato-Katz smear made with 41.7 mg of stool,  
132 by multiplying the egg count from the slide by a factor of 24 (24 x 41.7 mg ≈ 1 g) to get  
133 the number of eggs per gram of stool (EPG).

134

135

## Outcomes

136 The primary outcomes were individual-level infection status for each STH type (positive  
137 / negative) and intensity of infection in ~~eggs per gram (epg)~~. 

138

## Variables

139 Individual factors (including age, gender, history of deworming during the past year  
140 and shoe wearing behavior), household factors (including highest educational level  
141 achieved, head of household occupation, household asset index, urbanization), water  
142 sanitation and hygiene (WASH) factors (household water service, household  
143 sanitation, household hand washing facility) and environmental factors (elevation, soil  
144 sand fraction, soil acidity at average depth (0-5-15 cm), MODIS daytime land surface   
145 temperature mean for 2018 (°Celsius), MODIS Enhanced Vegetation Index (EVI) mean  
146 for 2018, MODIS normalized difference vegetation index (NDVI) mean for 2018, aridity  
147 index) were collected or constructed based on existing data.

148

149 *Water, Sanitation and Hygiene variables:* Water sources and sanitation facilities  
150 reported were grouped and categorized according to the 2017 WHO/UNICEF Joint  
151 Monitoring Program (JMP) methodology (none, improved, unimproved, limited or  
152 basic). (17) Improved drinking water sources are those that have the potential to deliver  
153 safe water by nature of their design and construction, while improved sanitation  
154 facilities are those designed to hygienically separate excreta from human contact. (18)  
155 **Distance** to the closest water source and sharing status for sanitation were also  
156 collected. 

157

158 *Asset index:* An asset index was compiled using principal components analysis. The  
159 procedure described by the Demographics and Health Survey (*Steps to constructing*  
160 *the new DHS Wealth Index*)(19) was followed, but factors associated with STH  
161 transmission (crowding [residents/room], WASH variables included in the risk factors  
162 analysis, and flooring materials) were excluded as they were evaluated separately in  
163 the model.

164

165 *Environmental variables:* We examined the association of the following environmental  
166 and sociodemographic factors with STH infection: mean enhanced vegetation index

167 and land surface temperature during the study period; elevation; aridity; soil acidity and  
168 sand content; and population density. These environmental, topographical, and  
169 sociodemographic measures were extracted for each household using point-based  
170 extraction using ArcGIS 10.3 (Environmental Systems Research Institute Inc.,  
171 Redlands, CA, USA). Data sources and methods have been described previously (20).  
172 Estimates of population density were obtained by calculating the number of individuals  
173 living within 1km<sup>2</sup> buffer around each household, which was used to classify areas as  
174 high, medium or low population density. Continuous variables were categorized by  
175 tertiles for analysis.

176

### 177 **Descriptive statistics**

178 Categorical variables were described using proportions and 95% confidence intervals,  
179 and the continuous variables were described by the median and interquartile ranges.  
180 To compare proportions, we used the Chi-square, and Cuzick trend tests. Continuous  
181 variables were compared using the Student T-test and analysis of variance (ANOVA).  
182 For each STH species we determined the cluster level prevalence (proportion of  
183 individuals infected in the cluster) and cluster level arithmetic mean of individual's egg  
184 density per gram of feces. We plotted the cluster level mean egg density against the  
185 cluster level prevalence and assessed the strength of the linear relationship using  
186 Pearson's correlation coefficient test. Descriptive statistics were generated using  
187 Stata® 14.0 (Stata Corp, College Station, Texas).

188

### 189 **Factors associated with STH infection**

190 Factors associated with presence and intensity of baseline infection with each STH  
191 species were identified using mixed effects models with random effects at the  
192 household and cluster levels and exchangeable correlation matrix. For binary infection  
193 status, mixed effects logistic regression was used, while for intensity of infection  
194 negative binomial mixed effects regression was used.

195 For the negative binomial regression, the output was the infection intensity ratio (IIR):

$$196 \text{ IIR} = e^{\beta} = e^{[\log(\mu_{x_{0+1}}) - \log(\mu_{x_0})]} = e^{[\log(\mu_{x_{0+1}} / \mu_{x_0})]}$$

197 where  $\beta$  is the regression coefficient,  $\mu$  is the expected intensity of infection (epg) and  
198 the subscripts represent where the predictor variable, say  $x$ , is evaluated at  $x_0$  and  $x_{0+1}$

199 (implying a one unit change in the predictor variable x). The IIR are interpreted as the  
200 ratio of expected intensity of infection for a one unit increase in the predictor variable  
201 given the other variables are held constant in the model.

202 All models were adjusted for age and sex. Groups of socio-economic status indicators,  
203 environmental factors and WASH factors hypothesized to be associated with infection  
204 were proposed *a priori* in the multivariable analysis. For groups of indicators with  
205 similar variables, the factor from each group with the lowest Akaike Information  
206 Criterion (AIC) in univariate analyses was selected for inclusion in the multivariable  
207 model. Models were further simplified by backward stepwise elimination until AIC was  
208 no longer further reduced in the adjusted model.

209 Random effects predicted by the fully adjusted model were compared to those  
210 predicted by a model containing only age and sex and the proportion of clustering  
211 explained by the explanatory variables was quantified.

212

### 213 **Ethics statement**

214 Ethical approval of the DeWorm3 trial protocol was obtained both from the Human  
215 Subjects Division at the University of Washington and the National Ethics Committee  
216 for Health Research of Benin. (CNERS ethical clearance reference No: 002-  
217 2017/MS/DC/SGM/DFR/CNERS-Ministry of Health, Benin). The trial was registered at  
218 Clinical Trials.gov [NCT03014167](https://clinicaltrials.gov/ct2/show/study/NCT03014167). Written consent was obtained from each participant  
219 (or participants' parents, when participants were under 18 years of age). For children  
220 aged 1-6 years old, verbal assent was obtained and for adolescents aged 7-17 years  
221 written assent was obtained. Data were collected electronically using password  
222 protected smartphones and was stored in datasets. Although WHO guidelines do not  
223 recommend MDA for adults, following the stool analysis any adults ( $\geq 15$  years of age)  
224 in control clusters presenting moderate to heavy intensity STH infection according to  
225 WHO definitions (21) or requiring treatment according to local guidelines, were treated  
226 with albendazole by study staff.

227

### 228 **Results**

## 229 Descriptive

230 Based on the census data, 11,979 individuals were selected for participation in three  
231 consecutive stages (Stage 1: n=5,979; Stage 2: n=3,000; Stage 3: n=3,000), with the  
232 goal to reach 150 individuals in each cluster: 30 PSAC, 30 SAC and 90 adults.  
233 Characteristics of the ~~longitudinal monitoring cohort (LMC)~~ population in comparison  
234 to censused population of the DeWorm3 site are presented in Table 1, and Fig 1  
235 presents the study flow chart. Individuals selected were listed as living in 9,265  
236 households from which 8,741 were located and visited. In those households 7,045  
237 individuals were present, among whom 6,814 consented to participate in the LMC  
238 cohort. Stool samples were collected from 6,153 individuals. The most common  
239 reasons for stool samples not being collected were (i) no sample visit documented  
240 (319), (ii) sample could not be collected after 3 visits (n=111), (ii) refusal to provide  
241 sample (n=231). As no documented survey could be verified for 14 individuals, Kato-  
242 Katz tests performed were confirmed for 6,139 samples comprising 1,184 PSAC  
243 (98.7% of 1,200 expected), 1,335 SAC (>100% of 1,200 expected), and 3,620 adults  
244 (>100% of 3,600 expected). In total 6,139 tests had two slides read by laboratory  
245 technicians. A random subset of Kato-Katz tests was selected for reading by the  
246 supervisor and compared against the original readings for quality assurance.

247

## 248 Prevalence of STH

249 Among the 6,139 individuals tested by Kato-Katz, STH infections of any type were  
250 found in 324 (5.3%), 199 (3.2%) due to hookworm spp. and 126 (2.0%) due to *Ascaris*.  
251 *Trichuris* was found in just 5 (0.1%) individuals (Table 2). Six individuals were co-  
252 infected with hookworm and *Ascaris*. Due to the small number of *Trichuris* infections,  
253 only analyses focused on hookworm spp. and *Ascaris* are presented. Among all  
254 infections, 258 (79.7%) were light-intensity, 54 (16.7%) moderate-intensity and 12  
255 (3.7%) heavy intensity infections. Hookworm spp. were more prevalent in adults than  
256 in SAC or PSAC (4.4% versus 2% versus 1% respectively,  $\chi^2$ ,  $p < 0.001$ ). SAC were  
257 more frequently infected with *Ascaris* compared to PSAC or adults (3% versus 2%  
258 versus 1.7% respectively,  $\chi^2$ ,  $p = 0.02$ ) (Fig 2). A higher proportion of males than  
259 females was infected with hookworm spp. (4% versus 2.6%;  $p = 0.002$ ) and *Ascaris*  
260 (2.6% versus 1.6%;  $p = 0.004$ ).

## 261 Intensity of STH infection

262 The median egg density for hookworm spp. was 108 eggs per gram (epg) (IQR: 48-  
263 312; range: 12-12,960), 3,840 epg for *Ascaris* (IQR: 312-15,180; range: 12-135,084)  
264 and 120 epg for *Trichuris* (IQR: 60-468; range: 36-20,124). The intensity of infection  
265 was similar in all age groups for hookworm spp. (ANOVA,  $p=0.22$ ), with a median egg  
266 density of 264 epg (IQR: 36-384; range: 12-3,048) in PSAC, 96 epg (IQR: 24-312;  
267 range: 12-11,100) in SAC and 108 epg (IQR: 48-288; range: 12-12,960) in adults. We  
268 found a difference in intensity of infection with *Ascaris* between age-groups (ANOVA,  
269  $p=0.005$ ), this difference was between SAC and adults (Bonferroni,  $p=0.004$ ). Median  
270 egg densities were 6,972 epg for PSAC (IQR: 264-26292; range: 12-60000), 7,848 epg  
271 for SAC (IQR: 3,714-25,314; range: 84-56,412) and 780 epg for adults (IQR: 36-8,772;  
272 range: 12-135084).

273 Moderate to heavy intensity (MHI) infections were found in 66/6,139 individuals overall  
274 (1.1%) amongst whom 10 (0.2%) MHI with hookworm spp., 55 (0.9%) MHI with *Ascaris*  
275 and 1 (<0.1%) MHI with *Trichuris* (Table 2). The burden of MHI was greatest in SAC  
276 with 2.1% (25/1,184) prevalence of MHI of *Ascaris* (Table S1). 68.2% (45/66) of MHI  
277 were found in males (Table S2). MHI were distributed in 15/40 clusters. MHI with  
278 hookworm spp. were present in 7/40 clusters, MHI with *Ascaris* in 7/40 clusters and  
279 MHI with *Trichuris* in 1 cluster. There were two clusters showing a particularly high  
280 burden of *Ascaris*, with respectively 19 (12.7%) and 30 (20%) individuals with MHI with  
281 *Ascaris*.

282

## 283 Age- and sex-related prevalence and intensity of STH infection 284 (hookworm and *Ascaris*)

285 Figs 3 and 4 show the age-infection profile for hookworm spp. and *Ascaris*,  
286 respectively. The prevalence of hookworm spp. increased with age in both sexes. The  
287 prevalence was similar in males and females among PSAC and SAC, but in adults, the  
288 prevalence in males was higher than in females except for 50-60 year olds, in whom  
289 females were more frequently infected. The intensity of hookworm infection was similar  
290 in males and females regardless of age, and was higher in adults than in children. The  
291 prevalence of *Ascaris* infection was similar in males and females across all ages, with  
292 the period of adolescence and early adulthood (between 10 and 18 years old)  
293 corresponding to the period with highest prevalence of *Ascaris* infection in males and

294 the lowest in females (6% for males *versus* 1% for females). Intensity of *Ascaris*  
295 infection followed the same profile as prevalence in both sexes.

296

297

## 298 **Community-level correlation between intensity and prevalence of** 299 **STH infection**

300 We found a positive linear relationship between STH infection prevalence and the  
301 intensity of infection at cluster level in our study population (Fig 5). This correlation was  
302 strong for both hookworm spp. ( $\rho=0.73$ ,  $p<0.0001$ ) and *Ascaris* ( $\rho=0.98$ ,  $p<0.0001$ ).

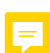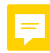

303

## 304 **Factors associated with hookworm infection**

305 The results of univariate analyses of factors associated with hookworm infection  
306 prevalence are presented in Table S2. ~~Here, the results of multivariable analyses are~~  
307 ~~presented~~ (Table 3).

308 At the individual level, PSAC and SAC were significantly less likely to be infected with  
309 hookworm spp. than adults (aOR=0.21, 95%CI 0.10-0.44,  $p<0.001$  and aOR=0.49,  
310 95%CI 0.29-0.83,  $p=0.008$ , respectively). Females were also significantly less likely to  
311 be infected than males (aOR=0.56, 95%CI 0.38-0.83,  $p=0.004$ ). Individuals who  
312 reported a history of deworming during the past year were significantly less likely to be  
313 infected (aOR= 0.45, 95%CI 0.27-0.75,  $p<0.002$ ).

314

315 Among household factors, the household asset index, a proxy measure for family  
316 wealth, showed that individuals in the poorest households had a significantly higher  
317 odds of infection than the richest (5<sup>th</sup> quintile) with a significant dose-response effect  
318 (Cuzick test of trend,  $p<0.001$ ), (First quintile: aOR= 5.03, 95%CI 2.10-12.01,  $p<0.001$ ,  
319 2<sup>nd</sup> quintile aOR= 3.62, 95%CI 1.51-8.66,  $p=0.001$  and 3<sup>rd</sup> quintile aOR= 2.51, 95%CI  
320 1.05-6.00,  $p=0.02$ ). With respect to occupational exposure, farmers were more likely  
321 to be infected with hookworm spp. than others (aOR= 1.79, 95%CI 1.11-2.90,  $p=0.02$ ).  
322 Individuals living in medium population density settings were more likely to be infected  
323 than those living in high density settings, (aOR= 2.59, 95%CI 1.25-5.40,  $p=0.01$ ).

324 Among WASH factors, household sanitation, and especially open defecation, was  
325 found to be strongly associated with hookworm infection. Individuals using improved

326 unshared sanitation facilities had half the odds of hookworm infection compared to  
327 those defecating outdoors (aOR=0.48, 0.24-0.98, p=0.04).

328

329  **Factors associated with hookworm infection intensity**

330 Children had a significantly lower intensity of hookworm infection ~~as~~ compared to  
331 adults (PSAC: adjusted IIR=0.10, 95%CI 0.03-0.31, p<0.001; SAC: adjusted IIR=0.29,  
332 95%CI 0.12 – 0.72, p=0.01). Females had significantly lower intensity infections than  
333 males (adjusted IIR=0.32, 95%CI 0.16–0.64, p=0.001), as did individuals dewormed  
334 the year before (adjusted IIR=0.20, 95%CI 0.08–0.48, p<0.001). (Table 3).

335

336  At the household level, less educated people (those with no education, primary school  
337 or secondary school) had higher intensity infections with hookworm spp. compared to  
338 those with university level education (adjusted IIR=40.13, 95%CI 2.47–652.77, p=0.01;  
339 adjusted IIR=30.92, 95%CI 1.86–513.88, p=0.02; adjusted IIR=19.34, 95%CI 1.21–  
340 308.81, p=0.04, respectively). Being a farmer, living in a house with natural floor  
341 material versus man-made floor material, and living in a peri-urban setting were also  
342 all factors found to be associated with a significantly increased intensity of hookworm  
343 infections (farmer: adjusted IIR=3.94, 95%CI 1.67–9.27, p=0.002; natural floor  
344 material: adjusted IIR=0.23, 95%CI 0.05-1.03, p=0.06; peri-urban settings: adjusted  
345 IIR=6.18, 95%CI 1.82 - 20.90, p=0.003).

346

347 Access to unimproved water available more than 30 minutes away from the house was  
348 associated with significantly higher intensity hookworm infection (adjusted IIR= 13.47,  
349 95%CI 1.62–111.55; p=0.02) compared to improved water available less than 30  
350 minutes from the house. Compared to open defecation behavior, using an improved  
351 and unshared toilet was associated with significantly lower intensity hookworm  
352 infections (adjusted IIR=0.23, 95%CI 0.07 – 0.70, p=0.01). No environmental factor  
353 was found to be associated with intensity of hookworm infections in multivariable  
354 analyses.

355



### **Factors associated with *Ascaris* infection prevalence.**

Among the individual factors assessed, SAC (5-14 years) were significantly more likely to be infected with *Ascaris* than adults (aOR= 2.0, 95%CI 1.1-3.6, p=0.01). However, no difference in odds of infection was found between PSAC and adults. Female individuals were less likely to be infected with *Ascaris* than males (aOR= 0.5, 95%CI 0.3-0.9, p= 0.02).

Amongst environmental factors, low soil acidity was significantly associated with increased odds of *Ascaris* infection compared to the highest soil acidity (aOR=4.8, 95%CI 1.8-13.1, p=0.002). Moderate [29.6-31.9°C] and high [31.9; 32.8°C] daytime land surface temperatures were associated with lower odds of infection with *Ascaris* compared to lower temperatures [26.2-29.6°C] (aOR=0.12, 95%CI 0.03-0.44, p=0.001; and aOR=0.17, 95%CI 0.03-0.91, p= 0.04 respectively). The summary of the multivariable analysis with *Ascaris* is presented in Table 4.

### **Intra-Class Correlation statistics for hookworm and *Ascaris* infection prevalence.**

Comparison of the Intra-Class Correlation values between models containing only age and sex (model 1) and the fully adjusted multivariable final model with all the fixed effect covariables (model 2) showed decreased ICC values in the fully adjusted model, considering either level-3 ICC at the cluster level or level-2 ICC at the household-within-cluster level (Table S4).

When only adjusting for age and sex, the prevalence of hookworm infection was correlated between individuals within the same cluster (ICC=0.16, 95%CI 0.10-0.26), and this correlation increased significantly between individuals within the same household and cluster level (ICC=0.58, 95%CI 0.40-0.74). Prevalence of *Ascaris* infection was moderately correlated within the same cluster (ICC=0.54, 95%CI 0.34-0.73), with a small increase within the same household and cluster level (ICC=0.60, 95%CI 0.26-0.76). In this model, household and cluster random effects compose approximately 58% and 60% of the total residual variance for hookworm spp. and *Ascaris* infection prevalence respectively.

388 In the fully adjusted multivariable final model,  we found a correlation of hookworm  
389 infection prevalence within the same cluster (ICC=0.03, 95%CI 0.01-0.10), although  
390 this correlation increased within the same household and cluster level (ICC=0.39,  
391 95%CI 0.17-0.65). *Ascaris* infection prevalence was moderately correlated between  
392 individuals within the same cluster (ICC=0.42, 95%CI 0.23-0.64), and this correlation  
393 increased slightly within the same household and cluster level (ICC=0.51, 95%CI 0.26-  
394 0.76). We estimated that household and cluster random effects compose  
395 approximately 39% and 51% of the total residual variance of hookworm and *Ascaris*  
396 infection prevalence, respectively, in the fully adjusted model.

397

## 398 Discussion

399 We observed a relatively low prevalence of STH in this region of Benin. Hookworm  
400 spp. were the most prevalent infections, and were more prevalent in adults, while  
401 *Ascaris* was more prevalent in children. Females were generally less infected than  
402 males across all ages. Females, children, those dewormed during the previous year  
403 and those using improved unshared sanitation facilities had lower odds of hookworm  
404 infections, while being a farmer, living in peri-urban settings versus urban and being  
405 poor was associated with a higher odds of hookworm infection. In addition to those  
406 factors, the intensity of hookworm infection was also decreased if an improved water  
407 source was available at less than 30 minutes distance.

408 Since 2013, the Ministry of Health in Benin has focused its efforts on developing and  
409 implementing strategies for the control of five NTDs considered to be of highest priority,  
410 namely trachoma, onchocerciasis, lymphatic filariasis, schistosomiasis and soil-  
411 transmitted helminths. Those efforts were bolstered markedly through the ENVISION   
412 program (22), a USAID-funded initiative that ran from 2013 through 2019 in Benin. A  
413 nationwide STH prevalence survey was completed in 2015, that reported 20%  
414 prevalence (13) in school-aged children in Comé district. Following that national  
415 mapping effort, 3 rounds of school-based MDA with albendazole were undertaken  
416 according to the recommendations of WHO, i.e. primarily targeting school-age (SAC)  
417 and pre-school age children (PSAC) for either once or twice yearly treatment as a  
418 function of the estimated prevalence of infection in any given district. (23) Coverage of

419 SAC with school MDA between 2015 and 2017 was estimated between 59% and 83%.  
420 Albendazole and/or Mebendazole are also distributed in health facilities and to  
421 pregnant women during routine antenatal care starting from the 2<sup>nd</sup> trimester of  
422 pregnancy. (24) In the context described, we sought to better understand patterns of  
423 STH infection in order to move towards the elimination of STH as a public health problem,  
424 by reaching a prevalence of STH less than 1%, as prescribed by the WHO Neglected  
425 Tropical Disease (NTD) Roadmap and London Declaration on NTD. (10,23)

426 When focusing on the at-risk population of SAC, the prevalence of STH infection found  
427 in the current study is lower than that reported in the same district using the same  
428 diagnostic technique in 2015 during the national mapping exercise (5.2% versus 20.0%  
429 respectively,  $p < 0.001$ ). That survey was conducted with a total of 250 stool samples  
430 from SAC collected from schools located in 5 rural villages. (13) The prevalence of  
431 infections with *Ascaris* (3.0% versus 15.6% respectively,  $p < 0.001$ ) or *Trichuris* (0.15%  
432 in 2018 versus 4.8% in 2015,  $p < 0.001$ ) decreased while the decrease in prevalence of  
433 hookworm spp. in SAC was less marked (2.0% in 2018 versus 4.0% in 2015,  $p = 0.054$ )  
434 compared to the findings of the national STH mapping 3 years earlier. (13) The decline  
435 in STH prevalence in the study area might be related to differences in sampling, as the  
436 current study was conducted in the community instead of in schools, with more than  
437 6,000 stools randomly selected from three age groups (PSAC, SAC and adults). (11)  
438 STH prevalence estimates can vary depending on the sampling strategies used. (25)  
439 The reasons for the observed variations of prevalence between hookworm spp. and  
440 other STH species in SAC could also be that STH rate of reinfection post-treatment  
441 varies across species, with a faster reinfection with *Ascaris* than hookworm spp. A  
442 systematic review of helminth reinfection at 3, 6, and 12 months (95% CI), after drug  
443 treatment shows that *Ascaris* prevalence reached 26% (16-43%), 68% (60-76%) and  
444 94% (88-100%) of pretreatment levels, respectively and for hookworm spp., 30% (26-  
445 34%), 55% (34-87%), and 57% (49-67%). (26) These results may also be partly  
446 explained by the fact that the current STH program does not include adults. The  
447 suggestion that hookworm spp. prevalence only decreased slightly between 2015 and  
448 2018, may be due to the persistent untreated adult reservoir in which hookworm spp.  
449 are most common. Data from several worm expulsion studies show that the proportion  
450 of hookworms harbored by adults ranged from 70 to 85%, (27–32) and a reinfection–  
451 infection study in Indonesia shows that adults have higher reinfection rates with

452 hookworm spp. than children. (33) Children cleared of hookworms through annual  
453 school de-worming could easily be re-infected at home through contact with adult  
454 members of their households.

455 Hookworm prevalence was higher in adults while *Ascaris* prevalence was higher in  
456 children. One explanation of these findings might be helminth species transmission  
457 modes. (34) The three species of STH (~~*A. lumbricoides*, *T. trichiura*, hookworm spp.~~)  
458 have relatively similar cycles involving the presence of adult worms in the intestine,  
459 however, the main mode of transmission of *Ascaris* and *Trichuris* is through  
460 contaminated food and water (parasite egg ingestion) whereas hookworm spp. are  
461 mainly transmitted by skin penetration, although they can be transmitted by ingestion.  
462 (35,36) The eggs of *Ascaris* and *Trichuris* are found in soil contaminated by human  
463 feces or in uncooked food contaminated by soil containing eggs of the worm. A person  
464 becomes infected after accidentally swallowing the fertile eggs. Children may be more  
465 likely to be infected with *Ascaris* because they are more likely to put their contaminated  
466 fingers in their mouths after playing in contaminated soil. (37) Unlike *Ascaris* infection,  
467 which declines in prevalence with age, hookworm infects all ages throughout life with  
468 prevalence increasing in adults. (27)

469 Community-level prevalence and the arithmetic mean of infection intensity were  
470 significantly correlated for all STH infections in our study, with a strong prevalence-  
471 intensity correlation for infection with hookworm and *Ascaris*. Similar trends were  
472 recently found in Kenya for hookworm spp. and *Trichuris*. (20) At the individual level,  
473 prevalence and intensity of hookworm infection followed the same trend. Markers of  
474 poverty and exposure to environmental sources of STH infection, including being a  
475 farmer, lack of improved or private sanitation facilities, low income, poor access to  
476 water, no or limited education, or living in a house with natural floor material were all  
477 associated with a higher prevalence or intensity of hookworm infection. These findings  
478 are linked with the mode of hookworm spp. transmission, which is direct either by  
479 ingestion (for *A. duodenale*) or by skin penetration (both *N. americanus* and *A.*  
480 *duodenale*) of infective larval stages living in the soil. (38,39) These findings are  
481 consistent with the results of a recent study in Kenya where there was a strong  
482 association between hookworm infection prevalence and intensity and socio-economic  
483 status, with those in the poorest households having the heaviest infections and highest  
484 prevalence, and wealthier individuals having the lightest intensity and reduced odds of

485 infection. (20) Globally, a negative correlation between hookworm infections and  
486 income level is demonstrated in cross-country comparisons. (40–42) Moderate  
487 population density, corresponding to a peri-urban environment, was also associated  
488 with both high prevalence and heavy intensity of hookworm infection when compared  
489 to the higher population density observed in urban environments. (43)

490

491 Although we found no association between hookworm prevalence and water source,  
492 quality of water seems to affect intensity of hookworm infection. Heavier intensity  
493 infections were found in participants with access only to unimproved water, such as  
494 unprotected wells, unprotected springs and surface water available at more than 30  
495 minutes from the house. In a school survey in Togo, unimproved drinking water was  
496 associated with higher odds and intensity of hookworm. (44) Malaysian children with  
497 access to piped water were less infected with hookworm. (45) However, other  
498 researchers have found no statistically significant associations between piped water  
499 access and hookworm infection (46,47). We did not find any association between  
500 WASH variables and either prevalence or intensity of *Ascaris* infection. However, there  
501 is evidence that integrated water, sanitation and hand hygiene intervention, treatment  
502 of water with chlorine (48), drinking piped water, as well as hand washing before eating  
503 and after defecating reduce the odds of *Ascaris* infection. (49)

504

505 This study had a number of strengths, including the large population size,  
506 completeness and quality of data and the high level of quality control for Kato-Katz  
507 diagnosis, with double reading by the lab technicians of the whole sample with an  
508 additional control of a subset of samples by a senior skilled parasitologist. However,  
509 this study does have some limitations. First, the STH prevalence in Com hides inter-  
510 and intra-specific variations between clusters that will be developed in further analyses  
511 once the parent study is unblinded and we have access to those results. It was also  
512 necessary to use a staged approach to sampling in order to achieve the required number  
513 of participants who consented to participate in the longitudinal monitoring cohort, which  
514 may have limited its representativeness. Another possible limitation is the reliance on  
515 Kato-Katz to detect STH. Kato-Katz is poorly sensitive, particularly for low intensity  
516 infections and can be affected by storage and processing time and methods. (50,51)

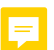

517 Future analyses using qPCR-based methods will allow for more sensitive detection of  
518 of STH in stool.

519

## 520 **Conclusion**

521 This analysis of the DeWorm3 baseline study data shows that hookworm spp. are the  
522 predominant STH in Comé, with a persistent reservoir in adults. This infection reservoir  
523 is not addressed by current school-based MDA control measures. These data suggest  
524 that community-based MDA may help eliminate STH as a public health problem.

525 Improved unshared sanitation and access to improved water sources are associated  
526 with lower prevalence and/or intensity of hookworm infection. Programmatic efforts  
527 should pay particular attention to farmers and populations living in poverty in urban,  
528 rural and peri-urban environments. The DeWorm3 trial (2017-2022) will determine the  
529 feasibility of STH transmission interruption through community-wide MDA given twice-  
530 a-year for three years in this setting and combined with these results will inform  
531 programmatic and policy decisions to improve efforts to eliminate morbidity and  
532 infection due to these pervasive infections.

533

## 534 **Declaration of competing interest:**

535 The DeWorm3 study is funded by Bill and Melinda Gates foundation. EA is a PhD  
536 candidate at the University of Paris. His research is funded by DeWorm3 as a staff  
537 member of the Benin coordinating team, and by the French Research Institute for  
538 Sustainable Development (IRD) through the International Mixed Laboratory LMI  
539 CONS\_HELM (helminth infections: treatments and consequences on health and  
540 development in the South).

541

## 542 **Authors' contribution:**

543 EFGAA, PH, MA, EA, GC, MI, AJFL, EY contributed to data collection,  
544 EFGAA performed the statistical analysis and wrote the first draft of the manuscript,

545 KHA designed the article statistical methodology and reviewed the analysis and entire  
546 article draft,

547 PH add inputs to the statistical analysis,

548 KHA, ARM, JLW, TJL, SG, designed the Deworm3 clinical trial

549 EFGAA, MA, KHA, AJFL, MI, AG, JLW reviewed the article draft and the final version.

550

551

552 **Funding:** Bill and Melinda Gates foundation

553 **Sponsor:** Natural History Museum, United Kingdom

### 554 **Collaborators:**

555 Bill and Melinda Gates Foundation

556 University of Washington

557 Imperial College London

558 London School of Hygiene and Tropical Medicine

559 Institut de Recherche Clinique du Bénin

560 Institut de Recherche pour le Développement

561

562

563

### 564 **Acknowledgements**

565 Thanks to Kate Halliday for sharing a Stata code to illustrate the age-infection profile  
566 for hookworm and *Ascaris*. We are particularly grateful to William Oswald, David  
567 Kennedy and Mira Emmanuel-Fabula for their invaluable contributions to data  
568 collection and quality.

569 We thank Dr Batcho and his staff of the National NTD Program (PNLMT), and finally  
570 we are grateful to all Comé district population, administrative and health authorities for  
571 their support in the success of this study.

572

573

574

575

576

577

## 578 **References**

579

580 1. Hotez P, Ottesen E, Fenwick A, Molyneux D. The neglected tropical diseases: the ancient  
581 afflictions of stigma and poverty and the prospects for their control and elimination. *Adv Exp*  
582 *Med Biol.* 2006;582:23–33.

583 2. Soil-transmitted helminth infections [Internet]. [cited 2019 Nov 3]. Available from:  
584 <https://www.who.int/news-room/fact-sheets/detail/soil-transmitted-helminth-infections>

585 3. WHO | 12th meeting of the Strategic and Technical Advisory Group for Neglected Tropical  
586 Diseases [Internet]. [cited 2020 Apr 4]. Available from:  
587 [https://www.who.int/neglected\\_diseases/events/twelfth\\_stag/en/](https://www.who.int/neglected_diseases/events/twelfth_stag/en/)

588 4. Soil-transmitted helminthiasis : eliminating as public health problem soil-transmitted  
589 helminthiasis in children : progress report 2001-2010 and strategic plan 2011-2020 [Internet].  
590 [cited 2020 Apr 24]. Available from: <https://apps.who.int/iris/handle/10665/44804>

591 5. Mpairwe H, Tweyongyere R, Elliott A. Pregnancy and helminth infections. *Parasite Immunol.*  
592 2014 Aug;36(8):328–37.

593 6. Mireku MO, Boivin MJ, Davidson LL, Ouédraogo S, Koura GK, Alao MJ, et al. Impact of Helminth  
594 Infection during Pregnancy on Cognitive and Motor Functions of One-Year-Old Children. Kang  
595 G, editor. *PLoS Negl Trop Dis.* 2015 Mar 10;9(3):e0003463.

596 7. Gall S, Müller I, Walter C, Seelig H, Steenkamp L, Pühse U, et al. Associations between selective  
597 attention and soil-transmitted helminth infections, socioeconomic status, and physical fitness in  
598 disadvantaged children in Port Elizabeth, South Africa: An observational study. Flisser A, editor.  
599 *PLoS Negl Trop Dis.* 2017 May 8;11(5):e0005573.

600 8. Larocque R, Casapia M, Gotuzzo E, Gyorkos TW. RELATIONSHIP BETWEEN INTENSITY OF SOIL-  
601 TRANSMITTED HELMINTH INFECTIONS AND ANEMIA DURING PREGNANCY. *Am J Trop Med Hyg.*  
602 2005 Oct 1;73(4):783–9.



- 603 9. Welch VA, Ghogomu E, Hossain A, Awasthi S, Bhutta ZA, Cumberbatch C, et al. Mass deworming  
604 to improve developmental health and wellbeing of children in low-income and middle-income  
605 countries: a systematic review and network meta-analysis. *Lancet Glob Health*. 2018 May  
606 22;5:e40-50.
- 607 10. London Declaration on Neglected Tropical Diseases | Uniting to Combat NTDs [Internet]. [cited  
608 2020 Apr 5]. Available from: [https://unitingtocombatntds.org/london-declaration-neglected-](https://unitingtocombatntds.org/london-declaration-neglected-tropical-diseases/)  
609 [tropical-diseases/](https://unitingtocombatntds.org/london-declaration-neglected-tropical-diseases/)
- 610 11. Ásbjörnsdóttir KH, Ajjampur SSR, Anderson RM, Bailey R, Gardiner I, Halliday KE, et al. Assessing  
611 the feasibility of interrupting the transmission of soil-transmitted helminths through mass drug  
612 administration: The DeWorm3 cluster randomized trial protocol. Garba A, editor. *PLoS Negl*  
613 *Trop Dis*. 2018 Jan 18;12(1):e0006166.
- 614 12. Boko PM, Ibikounle M, Onzo-Aboki A, Tougoue J-J, Sissinto Y, Batcho W, et al. Schistosomiasis  
615 and Soil Transmitted Helminths Distribution in Benin: A Baseline Prevalence Survey in 30  
616 Districts. Serrano Ferron E, editor. *PLOS ONE*. 2016 Sep 19;11(9):e0162798.
- 617 13. Ibikounlé M, Onzo-Aboki A, Doritchamou J, Tougoué J-J, Boko PM, Savassi BS, et al. Results of  
618 the first mapping of soil-transmitted helminths in Benin: Evidence of countrywide hookworm  
619 predominance. Aksoy S, editor. *PLoS Negl Trop Dis*. 2018 Mar 1;12(3):e0006241.
- 620 14. Team TDT. Baseline patterns of infection in regions of Benin, Malawi and India seeking to  
621 interrupt transmission of soil transmitted helminths (STH) in the DeWorm3 trial. *PLoS Negl Trop*  
622 *Dis*. 2020 Nov 2;14(11):e0008771.
- 623 15. EDS\_2012\_Rapport\_final-11-15-2013.pdf [Internet]. [cited 2020 Apr 5]. Available from:  
624 [https://www.insae-bj.org/images/docs/insae-statistiques/enquetes-recensements/EDS/2011-](https://www.insae-bj.org/images/docs/insae-statistiques/enquetes-recensements/EDS/2011-2012/EDS_2012_Rapport_final-11-15-2013.pdf)  
625 [2012/EDS\\_2012\\_Rapport\\_final-11-15-2013.pdf](https://www.insae-bj.org/images/docs/insae-statistiques/enquetes-recensements/EDS/2011-2012/EDS_2012_Rapport_final-11-15-2013.pdf)
- 626 16. Katz N, Chaves A, Pellegrino J. A simple device for quantitative stool thick-smear technique in  
627 *Schistosomiasis mansoni*. *Rev Inst Med Trop Sao Paulo*. 1972 Dec;14(6):397–400.
- 628 17. Methods | JMP [Internet]. [cited 2020 Oct 4]. Available from:  
629 <https://washdata.org/monitoring/methods>
- 630 18. Home | JMP [Internet]. [cited 2020 Jan 19]. Available from: <https://washdata.org/>

- 631 19. Shea O. Rutstein, DHS Asset index calculation - Recherche Google [Internet]. [cited 2019 Dec  
632 31]. Available from:  
633 [https://www.google.bj/search?sxsrf=ACYBGNQVqWgdnooBO2f7bESKoDpxgi\\_Eig%3A1577831986052&ei=Ms4LXu7pAoeiUsLjKAD&q=Shea+O.+Rutstein%2C+DHS+Asset+index+calculation&oq=Shea+O.+Rutstein%2C+DHS+Asset+index+calculation&gs\\_l=psy-ab.3..33i160.142205.151213..151495...0.0..0.294.7369.2-31.....0....1..gws-wiz.....35i39j33i21.ZigUpaQrJxY&ved=0ahUKEwjuyqyY-uDmAhUHkRQKHUIkAzQQ4dUDCAs&uact=5](https://www.google.bj/search?sxsrf=ACYBGNQVqWgdnooBO2f7bESKoDpxgi_Eig%3A1577831986052&ei=Ms4LXu7pAoeiUsLjKAD&q=Shea+O.+Rutstein%2C+DHS+Asset+index+calculation&oq=Shea+O.+Rutstein%2C+DHS+Asset+index+calculation&gs_l=psy-ab.3..33i160.142205.151213..151495...0.0..0.294.7369.2-31.....0....1..gws-wiz.....35i39j33i21.ZigUpaQrJxY&ved=0ahUKEwjuyqyY-uDmAhUHkRQKHUIkAzQQ4dUDCAs&uact=5)  
638
- 639 20. Halliday KE, Oswald WE, Mcharo C, Beaumont E, Gichuki PM, Kepha S, et al. Community-level  
640 epidemiology of soil-transmitted helminths in the context of school-based deworming: Baseline  
641 results of a cluster randomised trial on the coast of Kenya. Garba A, editor. PLoS Negl Trop Dis.  
642 2019 Aug 9;13(8):e0007427.
- 643 21. WHO Expert Committee. Prevention and control of schistosomiasis and soil-transmitted  
644 helminthiasis. World Health Organ Tech Rep Ser. 2002;912:i-vi, 1-57, back cover.
- 645 22. ENVISION | a world free of NTDs [Internet]. [cited 2020 Apr 5]. Available from:  
646 <http://www.ntdenvision.org/>
- 647 23. NTD\_RoadMap\_2012\_Fullversion.pdf [Internet]. [cited 2020 Apr 5]. Available from:  
648 [https://www.who.int/neglected\\_diseases/NTD\\_RoadMap\\_2012\\_Fullversion.pdf](https://www.who.int/neglected_diseases/NTD_RoadMap_2012_Fullversion.pdf)
- 649 24. Weltgesundheitsorganisation, editor. Preventive chemotherapy in human helminthiasis:  
650 coordinated use of anthelmintic drugs in control interventions ; a manual for health  
651 professionals and programme managers. Geneva: World Health Organization; 2006. 62 p.
- 652 25. Giardina F, Coffeng LE, Farrell SH, Vegvari C, Werkman M, Truscott JE, et al. Sampling strategies  
653 for monitoring and evaluation of morbidity targets for soil-transmitted helminths. Lustigman S,  
654 editor. PLoS Negl Trop Dis. 2019 Jun 26;13(6):e0007514.
- 655 26. Jia T-W, Melville S, Utzinger J, King CH, Zhou X-N. Soil-transmitted helminth reinfection after  
656 drug treatment: a systematic review and meta-analysis. PLoS Negl Trop Dis. 2012 Jan  
657 1;6(5):e1621.
- 658 27. Turner HC, Truscott JE, Bettis AA, Shuford KV, Dunn JC, Hollingsworth TD, et al. An economic  
659 evaluation of expanding hookworm control strategies to target the whole community. Parasit

- 660 Vectors [Internet]. 2015 Nov 5 [cited 2020 Apr 25];8. Available from:  
661 <https://www.ncbi.nlm.nih.gov/pmc/articles/PMC4635541/>
- 662 28. Ye XP, Wu ZX, Sun FH. The population biology and control of *Necator americanus* in a village  
663 community in south-eastern China. *Ann Trop Med Parasitol*. 1994 Dec;88(6):635–43.
- 664 29. Bradley M, Chandiwana SK, Bundy DA, Medley GF. The epidemiology and population biology of  
665 *Necator americanus* infection in a rural community in Zimbabwe. *Trans R Soc Trop Med Hyg*.  
666 1992 Feb;86(1):73–6.
- 667 30. Haswell-Elkins MR, Elkins DB, Manjula K, Michael E, Anderson RM. An investigation of  
668 hookworm infection and reinfection following mass anthelmintic treatment in the south Indian  
669 fishing community of Vairavankuppam. *Parasitology*. 1988 Jun;96 ( Pt 3):565–77.
- 670 31. Pritchard DI, Quinnell RJ, Slater AF, McKean PG, Dale DD, Raiko A, et al. Epidemiology and  
671 immunology of *Necator americanus* infection in a community in Papua New Guinea: humoral  
672 responses to excretory-secretory and cuticular collagen antigens. *Parasitology*. 1990 Apr;100 Pt  
673 2:317–26.
- 674 32. Anderson RM, Schad GA. Hookworm burdens and faecal egg counts: an analysis of the  
675 biological basis of variation. *Trans R Soc Trop Med Hyg*. 1985;79(6):812–25.
- 676 33. Soeripto N. Reinfection and infection rates of soil-transmitted-helminths in Kemiri Sewu,  
677 Yogyakarta, Indonesia. *Southeast Asian J Trop Med Public Health*. 1991 Jun;22(2):216–21.
- 678 34. Truscott JE, Turner HC, Farrell SH, Anderson RM. Soil-Transmitted Helminths: Mathematical  
679 Models of Transmission, the Impact of Mass Drug Administration and Transmission Elimination  
680 Criteria. *Adv Parasitol*. 2016;94:133–98.
- 681 35. Hookworm. - PubMed - NCBI [Internet]. [cited 2019 Nov 3]. Available from:  
682 [https://www.ncbi.nlm.nih.gov/pubmed/?term=Banwell+JG%2C+Schad+GA.+\(1978\)+Hookworm  
683 .+Clin+Gastroenterol.+7%3A129%E2%80%93356](https://www.ncbi.nlm.nih.gov/pubmed/?term=Banwell+JG%2C+Schad+GA.+(1978)+Hookworm+.+Clin+Gastroenterol.+7%3A129%E2%80%93356).
- 684 36. Prevention C-C for DC and. CDC - Hookworm [Internet]. 2019 [cited 2020 Apr 25]. Available  
685 from: <https://www.cdc.gov/parasites/hookworm/index.html>
- 686 37. WHO | Water related diseases [Internet]. WHO. World Health Organization; [cited 2020 Apr  
687 25]. Available from: [http://www.who.int/water\\_sanitation\\_health/diseases-  
688 risks/diseases/ascariasis/en/](http://www.who.int/water_sanitation_health/diseases-risks/diseases/ascariasis/en/)

- 689 38. Hoagland KE, Schad GA. *Necator americanus* and *Ancylostoma duodenale*: life history  
690 parameters and epidemiological implications of two sympatric hookworms of humans. *Exp*  
691 *Parasitol.* 1978 Feb;44(1):36–49.
- 692 39. Banwell JG, Schad GA. Hookworm. *Clin Gastroenterol.* 1978 Jan;7(1):129–56.
- 693 40. de Silva NR, Brooker S, Hotez PJ, Montresor A, Engels D, Savioli L. Soil-transmitted helminth  
694 infections: updating the global picture. *Trends Parasitol.* 2003 Dec 1;19(12):547–51.
- 695 41. Brooker S, Bethony J, Hotez PJ. Human Hookworm Infection in the 21st Century. *Adv Parasitol.*  
696 2004;58:197–288.
- 697 42. Fenghua S, Zhongxing W, Yixing Q, Hangqun C, Haichou X, Hainan R, et al. Epidemiology of  
698 human intestinal nematode infections in Wujiang and Pizhou counties, Jiangsu Province, China.  
699 *Southeast Asian J Trop Med Public Health.* 1998 Sep;29(3):605–10.
- 700 43. Yapi RB, Chammartin F, Hürlimann E, Hougbedji CA, N’Dri PB, Silué KD, et al. Bayesian risk  
701 profiling of soil-transmitted helminth infections and estimates of preventive chemotherapy for  
702 school-aged children in Côte d’Ivoire. *Parasit Vectors* [Internet]. 2016 Mar 21 [cited 2019 Nov  
703 12];9. Available from: <https://www.ncbi.nlm.nih.gov/pmc/articles/PMC4802658/>
- 704 44. Baker JM, Trinies V, Bronzan RN, Dorkenoo AM, Garn JV, Sognikin S, et al. The associations  
705 between water and sanitation and hookworm infection using cross-sectional data from Togo’s  
706 national deworming program. *PLoS Negl Trop Dis* [Internet]. 2018 Mar 28 [cited 2019 Nov  
707 12];12(3). Available from: <https://www.ncbi.nlm.nih.gov/pmc/articles/PMC5902041/>
- 708 45. Nasr NA, Al-Mekhlafi HM, Ahmed A, Roslan M, Bulgiba A. Towards an effective control  
709 programme of soil-transmitted helminth infections among Orang Asli in rural Malaysia. Part 1:  
710 Prevalence and associated key factors. *Parasit Vectors.* 2013;6(1):27.
- 711 46. Cundill B, Alexander N, Bethony JM, Diemert D, Pullan RL, Brooker S. Rates and intensity of re-  
712 infection with human helminths after treatment and the influence of individual, household, and  
713 environmental factors in a Brazilian community. *Parasitology.* 2011 Sep;138(11):1406–16.
- 714 47. Kounnavong S, Vonglokham M, Houamboun K, Odermatt P, Boupba B. Soil-transmitted  
715 Helminth Infections and Risk Factors in Preschool Children in Southern Rural Lao People’s  
716 Democratic Republic. *Trans R Soc Trop Med Hyg.* 105(3):160–3.

- 717 48. Pickering AJ, Njenga SM, Steinbaum L, Swarthout J, Lin A, Arnold BF, et al. Effects of single and  
718 integrated water, sanitation, handwashing, and nutrition interventions on child soil-transmitted  
719 helminth and Giardia infections: A cluster-randomized controlled trial in rural Kenya. *PLoS Med*  
720 [Internet]. 2019 Jun 26 [cited 2019 Nov 12];16(6). Available from:  
721 <https://www.ncbi.nlm.nih.gov/pmc/articles/PMC6594579/>
- 722 49. Strunz EC, Addiss DG, Stocks ME, Ogden S, Utzinger J, Freeman MC. Water, Sanitation, Hygiene,  
723 and Soil-Transmitted Helminth Infection: A Systematic Review and Meta-Analysis. *PLoS Med*  
724 [Internet]. 2014 Mar 25 [cited 2020 Jan 10];11(3). Available from:  
725 <https://www.ncbi.nlm.nih.gov/pmc/articles/PMC3965411/>
- 726 50. Bärenbold O, Raso G, Coulibaly JT, N’Goran EK, Utzinger J, Vounatsou P. Estimating sensitivity of  
727 the Kato-Katz technique for the diagnosis of *Schistosoma mansoni* and hookworm in relation to  
728 infection intensity. *PLoS Negl Trop Dis* [Internet]. 2017 Oct 4 [cited 2020 Oct 24];11(10).  
729 Available from: <https://www.ncbi.nlm.nih.gov/pmc/articles/PMC5643140/>
- 730 51. Nikolay B, Brooker SJ, Pullan RL. Sensitivity of diagnostic tests for human soil-transmitted  
731 helminth infections: a meta-analysis in the absence of a true gold standard. *Int J Parasitol*. 2014  
732 Oct 1;44(11):765–74.

733

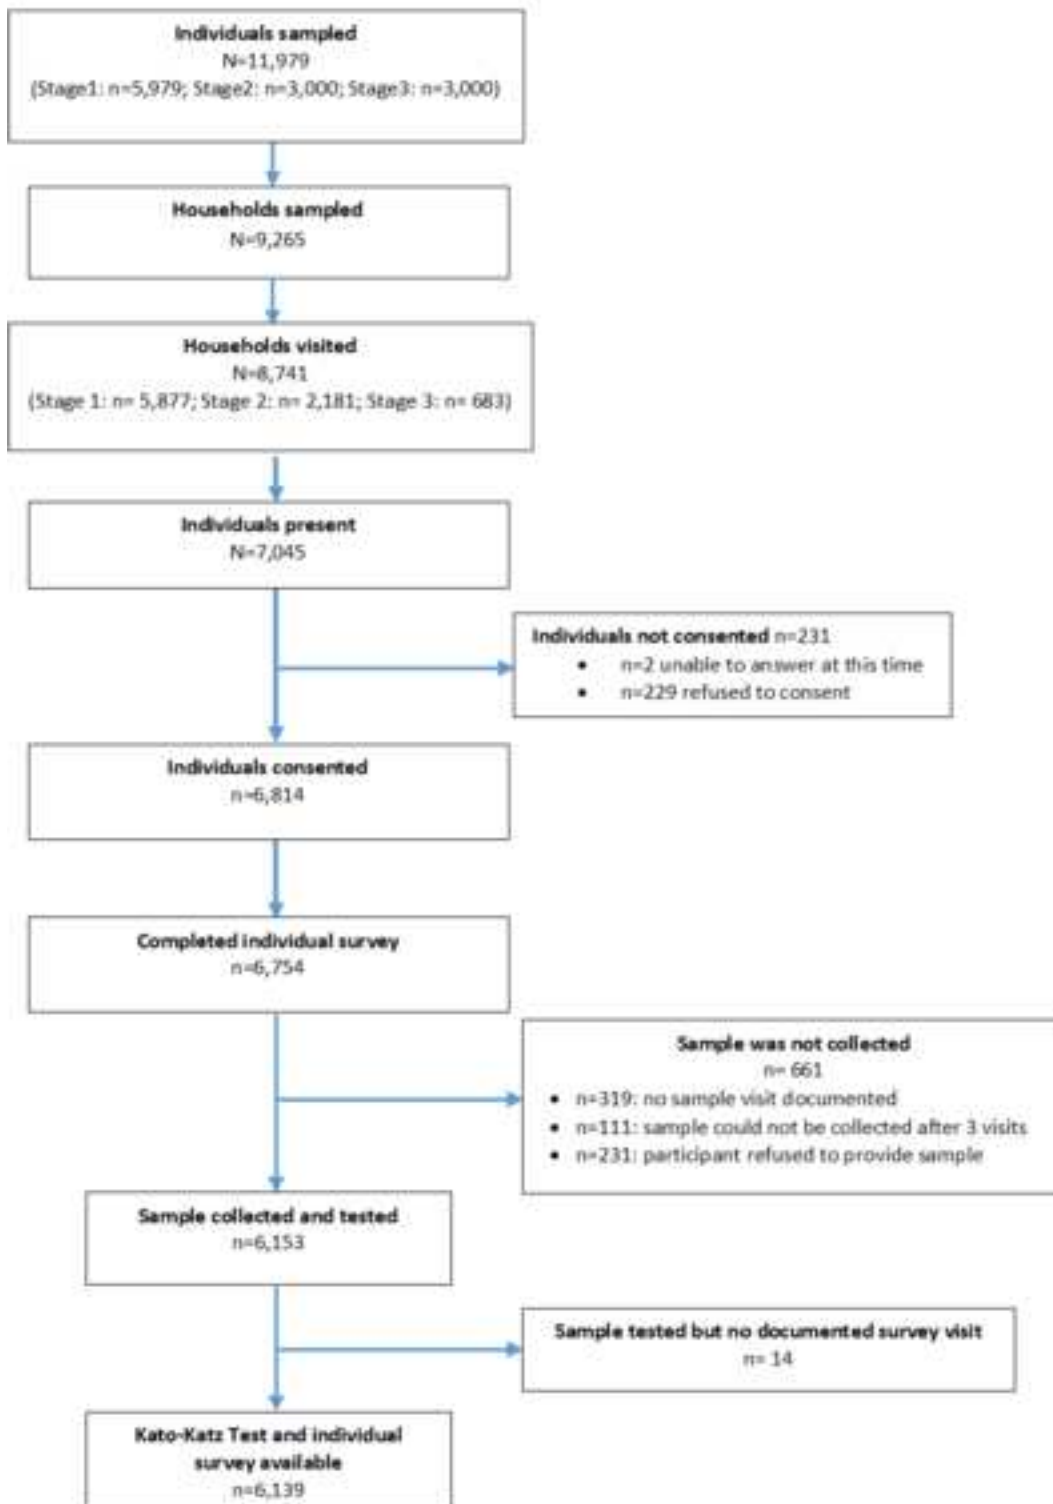

**Fig 1:** Flow diagram of stool sample collection for Benin site DeWorm3 baseline prevalence survey in Comé

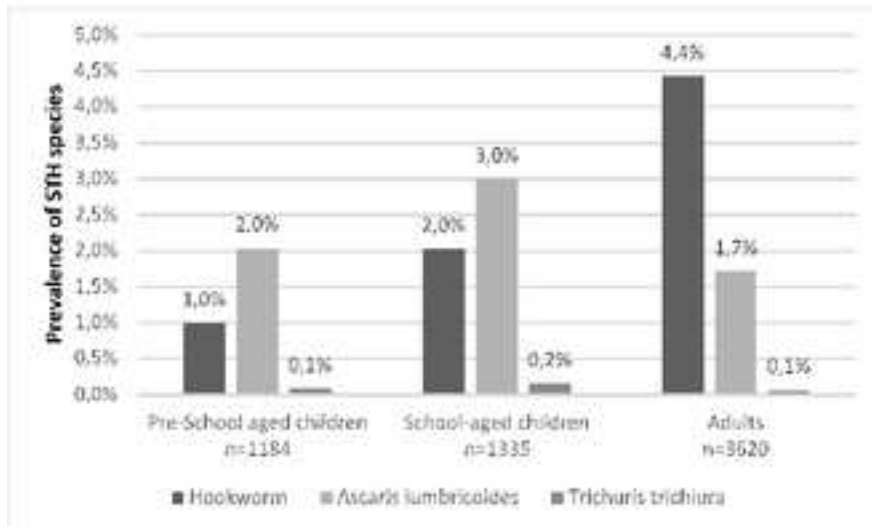

Fig 2: STH unweighted prevalence across age-groups

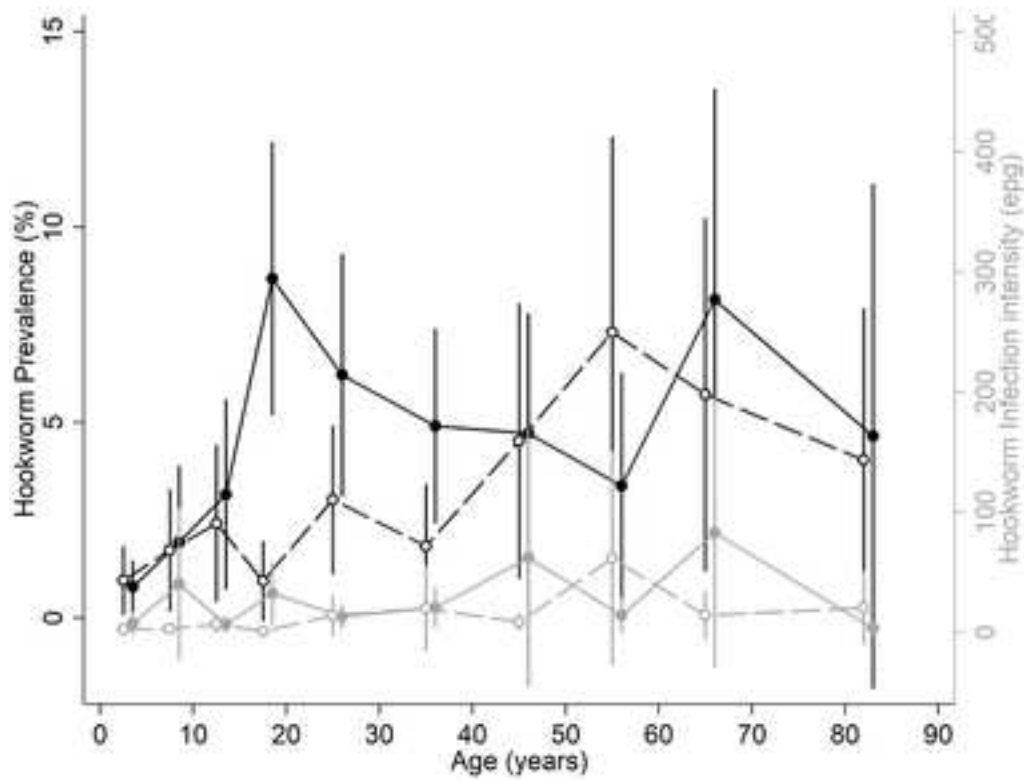

**Fig 3. Age-infection profiles for hookworm.** (A) Prevalence (black lines) and intensity (grey lines) of hookworm infection by age for males (solid line and circles) and females (dashed lines and empty circles). Vertical bars represent confidence intervals.



Fig 4: Age-infection profiles for *Ascaris*. (A) Prevalence (black lines) and intensity (grey lines) of *Ascaris* infection by age for

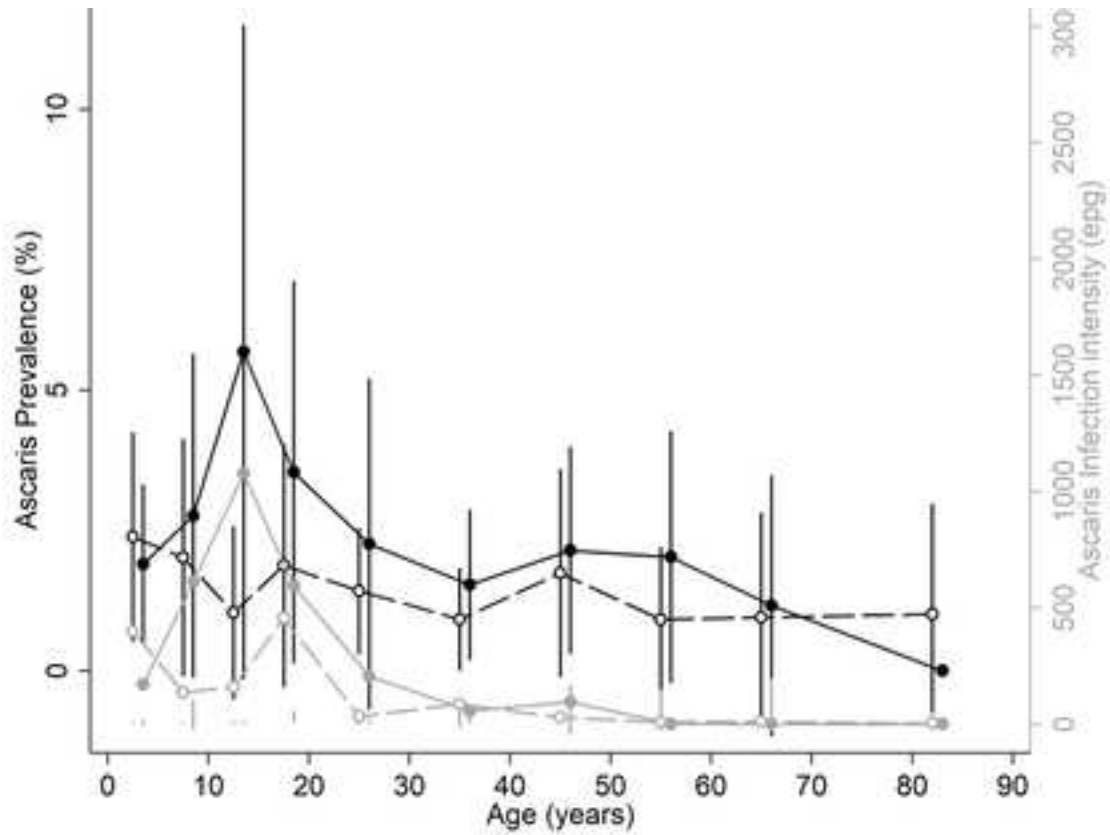

**Fig 4. Age-infection profiles for *Ascaris*.** (A) Prevalence (black lines) and intensity (grey lines) of *Ascaris* infection by age for males (solid line and circles) and females (dashed lines and empty circles). Vertical bars represent confidence intervals.

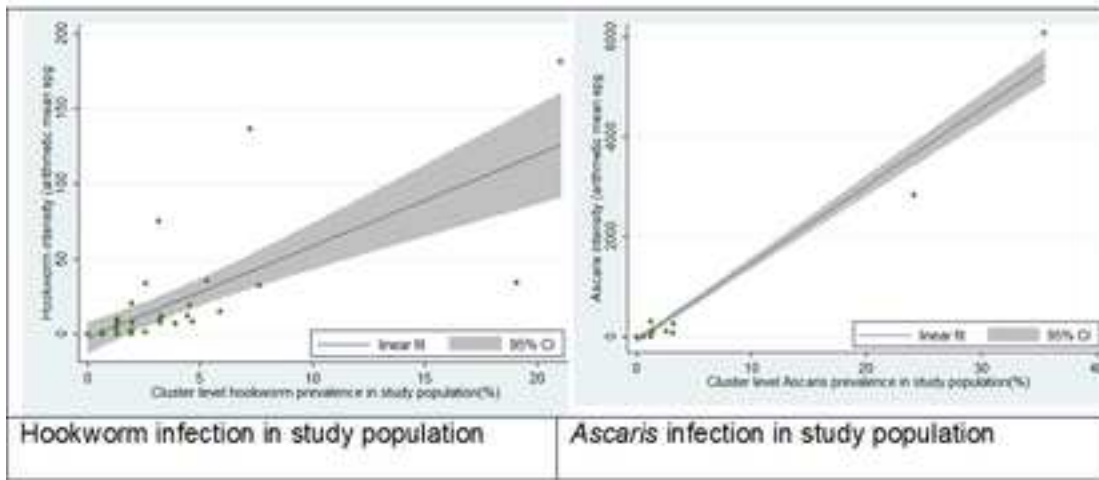

**Figure 5:** Cluster level correlation between prevalence and intensity of hookworm and Ascaris infection in the study population.

**Table 1:** Comparison of censused population of the DeWorm3 site and longitudinal monitoring cohort (LMC).

|                                          | Census<br>n (%) /<br>median (IQR) | LMC<br>n (%) / median (IQR) |
|------------------------------------------|-----------------------------------|-----------------------------|
| <b>Study population (consented)</b>      | 94,969 (83.99)                    | 6,814 (96.52)               |
| Gender*                                  |                                   |                             |
| - Female                                 | 49,080 (51.68)                    | 3,311 (53.93)               |
| - Male                                   | 45,888 (48.32)                    | 2,828 (46.07)               |
| Age distribution*                        |                                   |                             |
| - Infants (<1 years)                     | 2,616 (2.75)                      | -                           |
| - Preschool-age children (1-4 years)     | 11,188 (11.78)                    | 1,184 (19.29)               |
| - School age children (5-14 years)       | 26,043 (27.42)                    | 1,335 (21.75)               |
| - Adults (15+ years)                     | 54,882 (57.79)                    | 3,620 (58.97)               |
| <b>Household characteristics</b>         |                                   |                             |
| Roof materials*                          |                                   |                             |
| - Natural materials                      | 5,311 (5.59)                      | 349 (5.68)                  |
| - Man-made materials                     | 89,342 (94.07)                    | 5,771 (94.01)               |
| Walls materials                          |                                   |                             |
| - Natural materials                      | 22,200 (23.38)                    | 1,359 (22.14)               |
| - Man-made materials                     | 71,258 (75.03)                    | 4,665 (75.99)               |
| Flooring materials                       |                                   |                             |
| - Natural materials                      | 16,336 (17.20)                    | 950 (15.47)                 |
| - Man-made materials                     | 78,200 (82.34)                    | 5,162 (84.09)               |
| Sources of income<br>-categories         |                                   |                             |
| Asset Index quintiles                    | (n=24,378 households)             | (n=6,139 individuals)       |
| Quintile 1 : range [-2.67;-1.84]         | 5,243 (21.51)                     | 985 (16.04)                 |
| Quintile 2 : range [-1.84;-1.19]         | 4,620 (18.95)                     | 1,043 (16.99)               |
| Quintile 3 : range [-1.19;-0.16]         | 4,840 (19.85)                     | 1,175 (19.14)               |
| Quintile 4 : range [-0.16; 2.00]         | 4,884 (20.03)                     | 1,378 (22.45)               |
| Quintile 5 : range [2.00; 12.04]         | 4,791 (19.65)                     | 1,558 (25.38)               |
| <b>Number of Residents/per Household</b> | 5 (4-7)                           | 5 (4-7)                     |

\*Missing <5% unless otherwise specified.

**Table 2:** Unweighted STH prevalence and intensity of infection by Kato-Katz testing. N=6139

| Kato-Katz Indicator                                                                                                                                                                                                                                                                                                                                                                                                                                                           | Any STH prevalence (%) | Hookworm prevalence (%) | <i>Ascaris</i> prevalence (%) | <i>Trichuris</i> prevalence (%) |
|-------------------------------------------------------------------------------------------------------------------------------------------------------------------------------------------------------------------------------------------------------------------------------------------------------------------------------------------------------------------------------------------------------------------------------------------------------------------------------|------------------------|-------------------------|-------------------------------|---------------------------------|
| <b>UNWEIGHTED ESTIMATES</b>                                                                                                                                                                                                                                                                                                                                                                                                                                                   |                        |                         |                               |                                 |
| <b>Unweighted Kato-Katz prevalence: n (%)<sup>1</sup></b>                                                                                                                                                                                                                                                                                                                                                                                                                     |                        |                         |                               |                                 |
| Positive                                                                                                                                                                                                                                                                                                                                                                                                                                                                      | 324 (5.3)              | 199 (3.2)               | 126 (2.0)                     | 5 (0.1)                         |
| Negative                                                                                                                                                                                                                                                                                                                                                                                                                                                                      | 5,815 (94.7)           | 5,940 (96.8)            | 6,013 (98.0)                  | 6,134 (99.9)                    |
| <b>Intensity of infection, among positive Kato-Katz tests: n (%)<sup>2</sup></b>                                                                                                                                                                                                                                                                                                                                                                                              |                        |                         |                               |                                 |
| Light-intensity                                                                                                                                                                                                                                                                                                                                                                                                                                                               | 258 (79.6)             | 189 (95.0)              | 71 (56.3)                     | 4 (80.0)                        |
| Moderate-intensity                                                                                                                                                                                                                                                                                                                                                                                                                                                            | 54 (16.7.)             | 4 (2.0)                 | 50 (39.7)                     | 0 (0.0)                         |
| Heavy-intensity                                                                                                                                                                                                                                                                                                                                                                                                                                                               | 12 (3.7)               | 6 (3.0)                 | 5 (4.0)                       | 1 (20.0)                        |
| <b>Unweighted prevalence of moderate/heavy intensity infections: n (%)</b>                                                                                                                                                                                                                                                                                                                                                                                                    |                        |                         |                               |                                 |
| Moderate- or Heavy-intensity infection                                                                                                                                                                                                                                                                                                                                                                                                                                        | 66 (0.2)               | 10 (0.0)                | 55 (0.9)                      | 1 (0)                           |
| <sup>1</sup> Positivity was defined as the presence of eggs on one of two slides read by laboratory technicians.                                                                                                                                                                                                                                                                                                                                                              |                        |                         |                               |                                 |
| <sup>2</sup> Light-intensity infections are defined as 1-4,999 epg of faeces for <i>Ascaris</i> infection, 1-999 epg for <i>Trichuris</i> and 1-1,999 epg for Hookworms. Moderate-intensity infections are defined as 5,000-49,999 epg for <i>Ascaris</i> , 1,000-9,999 epg for <i>Trichuris</i> and 2,000-3,999 epg for Hookworms. Heavy-intensity infections are defined as 50,000+ epg for <i>Ascaris</i> , 10,000+ epg for <i>Trichuris</i> and 4,000+ epg for Hookworms. |                        |                         |                               |                                 |

**Table 3** :Factors associated with the the prevalence and the intensity of hookworm infection in Comé, Bénin : findings from a cross-sectional baseline prevalence survey in the DeWorm3 STH–elimination trial.

| Variables                                 | Prevalence      | Intensity of infection       | Generalized Logistic Mixed Model Multivariate Analysis †§ |         | Negative binomial regression Multivariate Analysis ‡♣ |         |
|-------------------------------------------|-----------------|------------------------------|-----------------------------------------------------------|---------|-------------------------------------------------------|---------|
|                                           | n (%)           | median (IQR), [min, max] epg | Adjusted Odds Ratio (95%CI)                               | p-value | Adjusted Infection Intensity Ratio (95%CI)            | p-value |
| <b>INDIVIDUAL factors</b>                 |                 |                              |                                                           |         |                                                       |         |
| Age                                       | n =6,139        | N=6,138                      |                                                           | <0.0001 |                                                       |         |
| - Adults (≥15 years )                     | 160/3,620 (4.4) | 0(0-0), [0-12,960]           | Reference                                                 |         | Reference                                             |         |
| - PreSAC (1-4 years)                      | 27/1,335 (2.0)  | 0 (0-0), [0-3,552]           | 0.21 (0.10-0.44)                                          | < 0.001 | 0.10 (0.03 - 0 .31)                                   | <0.001  |
| - SAC (5-14 years)                        | 12/1,184 (1.0)  | 0 (0-0), [0-11,100]          | 0.49 (0.29-0.83)                                          | 0.008   | 0.29 (0.12 – 0.72)                                    | 0.01    |
| Gender                                    | n total=6,139   | N=6,138                      |                                                           | 0.004   |                                                       |         |
| - Male                                    | 113/2,828 (4.0) | 0 (0-0), [0-12,960]          | Reference                                                 |         | Reference                                             |         |
| - Female                                  | 86/3,311 (2.6)  | 0 (0-0), [0-9,840]           | 0.56 (0.38-0.83)                                          | 0.004   | 0.32 (0.16 – 0.64)                                    | 0.001   |
| History of deworming during the past year | n total=6,091   | N=6,090                      |                                                           | 0.002   |                                                       |         |
| - No                                      | 171/3,687 (4.6) | 0 (0-0), [0-12,960]          | Reference                                                 |         | Reference                                             |         |
| - Yes                                     | 28/2,404 (1.2)  | 0 (0-0), [0-3,048]           | 0.45 (0.27-0.75)                                          | < 0.002 | 0.20 (0.08 – 0.48)                                    | <0.001  |
| Shoe wearing behavior                     | n =6,091        | N=6,090                      | *                                                         |         | *                                                     |         |
| - Shoes                                   | 100/3,348 (3.0) | 0 (0-0), [0-12,960]          |                                                           |         |                                                       |         |
| - No shoes                                | 99/2,743 (3.6)  | 0 (0-0), [0-11,100]          |                                                           |         |                                                       |         |
| Current school attendance                 | n =6,139        | 6,138                        | *                                                         |         | *                                                     |         |
| - No                                      | 152/4,294 (3.5) | 0(0-0), [0-12,960]           |                                                           |         |                                                       |         |
| - Yes                                     | 47/1,845 (2.5)  | 0(0-0), [0-11,100]           |                                                           |         |                                                       |         |
| <b>HOUSEHOLD factors</b>                  |                 |                              |                                                           |         |                                                       |         |
| Highest education level in the household  | n =6,139        | 6,138                        | *                                                         |         |                                                       |         |
| - University/College/Diploma              | 4/698 (0.6)     | 0(0-0), [0-228]              |                                                           |         | Reference                                             |         |
| - No education                            | 93/1,942 (4.8)  | 0(0-0), [0-12,960]           |                                                           |         | 40.13 (2.47 – 652.77)                                 | 0.01    |
| - Primary                                 | 50/1,341 (3.7)  | 0(0-0), [0-11,100]           |                                                           |         | 30.92 (1.86 – 513.88)                                 | 0.02    |

| Variables                                            | Prevalence      | Intensity of infection       | Generalized Logistic Mixed Model Multivariate Analysis †§ |         | Negative binomial regression Multivariate Analysis ‡¶ |         |
|------------------------------------------------------|-----------------|------------------------------|-----------------------------------------------------------|---------|-------------------------------------------------------|---------|
|                                                      | n (%)           | median (IQR), [min, max] epg | Adjusted Odds Ratio (95%CI)                               | p-value | Adjusted Infection Intensity Ratio (95%CI)            | p-value |
| - Secondary                                          | 52/2,158 (2.4)  | 0(0-0), [0-4,764]            |                                                           |         | 19.34 (1.21 – 308.81)                                 | 0.04    |
| Quintiles of household asset index                   | n =6,139        | 6,138                        |                                                           | <0.0001 | *                                                     |         |
| - 5th quintile (richest)                             | 16/1,558 (1.0)  | 0(0-0), [0-1,440]            | Reference                                                 |         |                                                       |         |
| - 1st quintile (poorest)                             | 76/985 (7.7)    | 0(0-0), [0-12,960]           | 5.03 (2.10-12.01)                                         | <0.001  |                                                       |         |
| - 2nd quintile                                       | 51/1,043 (4.9)  | 0(0-0), [0-4,764]            | 3.62 (1.51-8.66)                                          | 0.001   |                                                       |         |
| - 3rd quintile                                       | 38/1,175 (3.2)  | 0(0-0) [0-9,840]             | 2.51 (1.05-6.00)                                          | 0.02    |                                                       |         |
| - 4th quintile                                       | 18/1,378 (1.3)  | 0(0-0), [0-1,104]            | 0.94 (0.36-2.51)                                          | 0.91    |                                                       |         |
| Head of household's occupation                       | n =6,139        | 6,138                        |                                                           | 0.03    |                                                       |         |
| - Others/ Don't know/Refused                         | 98/4,618 (2.1)  | 0(0-0), [0-4,764]            | Reference                                                 |         | Reference                                             |         |
| - Farmer                                             | 89/921 (9.7)    | 0(0-0), [0-12,960]           | 1.79 (1.11-2.90)                                          | 0.02    | 3.94 (1.67 – 9.27)                                    | 0.002   |
| - Fisher                                             | 12/600 (2.0)    | 0(0-0), [0-516]              | 0.70 (0.31-1.60)                                          | 0.70    | 0.23 (0.05 - 1.03)                                    | 0.06    |
| Observed floor type : natural/manmade                | n =6,139        | 6,138                        |                                                           | *       |                                                       |         |
| - Man-made floor material                            | 123/5,162 (2.4) | 0(0-0), [0-11,100]           |                                                           |         | Reference                                             |         |
| - Natural floor material                             | 75/950 (7.9)    | 0(0-0), [0-12,960]           |                                                           |         | 3.02 (1.36 – 6.70)                                    | 0.01    |
| - Other/Don't know/Refused                           | 1/27 (3.7)      | 0(0-0), [0-48]               |                                                           |         | 3.48 (0.02 - 664.60)                                  | 0.65    |
| Urbanization                                         | n =6,134        | 6,133                        |                                                           | 0.02    |                                                       |         |
| - Urban                                              | 29/2,418 (1.2)  | 0(0-0), [0-9,840]            | Reference                                                 |         | Reference                                             |         |
| - Peri-urban                                         | 146/2,922 (5.0) | 0(0-0), [0-12,960]           | 2.59 (1.25-5.40)                                          | 0.01    | 6.18 (1.82 - 20.90)                                   | 0.003   |
| - Rural                                              | 24/794 (3.0)    | 0(0-0), [0-3,120]            | 1.37 (0.58-3.24)                                          | 0.48    | 1.88 (0.42 – 8.46)                                    | 0.41    |
| 3 tertiles of population density at 1km <sup>2</sup> | n =6,134        | 6,133                        |                                                           | *       | *                                                     |         |
| 1 <sup>st</sup> tertile [3 ; 542[ low                | 135/2,021 (6.7) | 0(0-0) [0-12,960]            |                                                           |         |                                                       |         |
| 2 <sup>nd</sup> tertile [542 ; 1235[medium           | 43/2,072 (2.1)  | 0(0-0), [0-3,624]            |                                                           |         |                                                       |         |
| 3 <sup>rd</sup> tertile [ 1235 ; 2528] high          | 21/2,041 (1.0)  | 0(0-0), [0-9,840]            |                                                           |         |                                                       |         |
| <b>WASH factors</b>                                  |                 |                              |                                                           |         |                                                       |         |
| Household water SDG service modified                 | n =6,135        | 6,134                        |                                                           | *       |                                                       |         |

| Variables                                                  | Prevalence      | Intensity of infection       | Generalized Logistic Mixed Model Multivariate Analysis †§ |         | Negative binomial regression Multivariate Analysis ‡¶ |         |
|------------------------------------------------------------|-----------------|------------------------------|-----------------------------------------------------------|---------|-------------------------------------------------------|---------|
|                                                            | n (%)           | median (IQR), [min, max] epg | Adjusted Odds Ratio (95%CI)                               | p-value | Adjusted Infection Intensity Ratio (95%CI)            | p-value |
| - Improved ≤ 30min                                         | 141/5,098 (2.8) | 0 (0-0), [0-2,124]           |                                                           |         | Reference                                             |         |
| - Surface water > 30min                                    | 0/3 (0.0)       | 0(0-0), [0-3120]             |                                                           |         | 0                                                     | -       |
| - Surface water ≤ 30min                                    | 2/16 (12.5)     | 0(0-0), [0-120]              |                                                           |         | 45.62 (0.76 - 2726.46)                                | 0.07    |
| - Unimproved > 30min                                       | 6/53 (11.3)     | 0(0-0), [0-696]              |                                                           |         | 13.47 (1.62 – 111.55)                                 | 0.02    |
| - Unimproved ≤ 30min                                       | 39/583 (6.7)    | 0(0-0), [0-2,124]            |                                                           |         | 1.89 (0.69 - 5.12)                                    | 0.21    |
| - Improved > 30 min                                        | 11/382 (2.9)    | 0(0-0), [0-3,120]            |                                                           |         | 0.69 (0.16 – 3.01)                                    | 0.62    |
|                                                            | n =5,816        |                              |                                                           | 0.24    |                                                       |         |
| Household sanitation SDG service                           | 129/2,162 (6.0) | 5,815                        | Reference                                                 |         |                                                       |         |
| - Open defecation                                          | 3/227 (1.3)     | 0(0-0), [0-12,960]           | 0.50 (0.13-1.93)                                          | 0.32    | Reference                                             |         |
| - Unimproved shared                                        | 1 /127(0.8)     | 0(0-0), [0-60]               | 0.23 (0.02-2.24)                                          | 0.20    | 0.18 (0.01 – 2.26)                                    | 0.19    |
| - Unimproved unshared                                      | 28/1,666 (1.7)  | 0(0-0), [0-204]              | 0.73 (0.38-1.37)                                          | 0.33    | 0.07 (0.002 – 2.16)                                   | 0.13    |
| - Improved shared                                          | 28/1,634 (1.7)  | 0(0-0), [50-9,840]           | 0.48 (0.24-0.98)                                          | 0.04    | 0.44 (0.116 – 1.25)                                   | 0.12    |
| - Improved unshared                                        | n = 5,716       | 0(0-0), [0-1,440]            | **                                                        | 0.46    | 0.23 (0.07 – 0.70)                                    | 0.01    |
| Household Hand washing facility SDG service                | 64/1,881 (3.4)  | 5,715                        | Reference                                                 |         | **                                                    |         |
| - No facility                                              | 104/3,111 (3.3) | 0(0-0), [0-12,960]           | 0.94 (0.61-1.44)                                          | 0.76    | Reference                                             |         |
| - Limited                                                  | 13/724 (1.8)    | 0(0-0), [0-8,064]            | 0.61 (0.28-1.34)                                          | 0.22    | 0.83 (0.39 – 1.77)                                    | 0.64    |
| - Basic                                                    |                 | 0(0-0), [0-1,440]            |                                                           |         | 0.44 (0.11 – 1.73)                                    | 0.24    |
| <b>ENVIRONMENTAL Factors</b>                               |                 |                              |                                                           |         |                                                       |         |
| Elevation (in meters)                                      | n = 6,134       | 6,133                        | **                                                        | 0.12    | *                                                     |         |
| 1 <sup>st</sup> tertile [-1 ; 15[ (low)                    | 63/2,094 (3.0)  | 0(0-0), [0-12,960]           | Reference                                                 |         |                                                       |         |
| 2 <sup>nd</sup> tertile [15 ; 30[ (medium)                 | 37/2,300 (1.6)  | 0(0-0), [0-9,840]            | 1.07 (0.53-2.17)                                          | 0.85    |                                                       |         |
| 3 <sup>rd</sup> tertile [30 ; 61] (high)                   | 99/1,740 (5.7)  | 0(0-0), [0-11,100]           | 1.73 (0.98-3.06)                                          | 0.06    |                                                       |         |
| Proportion of soil that is sand at the surface at 0 cm (%) | n total=6,134   | 6,133                        | *                                                         |         | *                                                     |         |
| 1 <sup>st</sup> tertile [35 ; 55[ (low)                    | 37/2,143 (1.7)  | 0(0-0), [0-1,176]            |                                                           |         |                                                       |         |
| 2 <sup>nd</sup> tertile [55 ; 64[ (medium)                 | 40/2,001 (2.0)  | 0(0-0), [0-3,624]            |                                                           |         |                                                       |         |

| Variables                                                         | Prevalence      | Intensity of infection       | Generalized Logistic Mixed Model Multivariate Analysis †§ |         | Negative binomial regression Multivariate Analysis ‡¶ |         |
|-------------------------------------------------------------------|-----------------|------------------------------|-----------------------------------------------------------|---------|-------------------------------------------------------|---------|
|                                                                   | n (%)           | median (IQR), [min, max] epg | Adjusted Odds Ratio (95%CI)                               | p-value | Adjusted Infection Intensity Ratio (95%CI)            | p-value |
| 3 <sup>rd</sup> tertile [64 ; 78] (high)                          | 122/1,990 (6.1) | 0(0-0), [0-12,960]           |                                                           |         |                                                       |         |
| Soil acidity (pH KCL) at average depth (0-5-15 cm)                | n total= 6,134  | 6,133                        | *                                                         |         | *                                                     |         |
| 1 <sup>st</sup> tertile [4.8 ; 5.1] (low)                         | 40/2,810 (2.0)  | 0(0-0), [0-11,100]           |                                                           |         |                                                       |         |
| 2 <sup>nd</sup> tertile [5.1 ; 5.2] (medium)                      | 90/1,230 (4.0)  | 0(0-0), [0-9,840]            |                                                           |         |                                                       |         |
| 3 <sup>rd</sup> tertile [5.2 ; 5.7] (high)                        | 69/2,094 (3.7)  | 0(0-0), [0-12,960]           |                                                           |         |                                                       |         |
| MODIS daytime land surface temperature mean for 2018 (°celsius)   | n = 6,134       | 6,133                        | *                                                         |         | *                                                     |         |
| 1 <sup>st</sup> tertile [26.2 ; 29.6] (low)                       | 71/2,097 (3.4)  | 0(0-0), [0-11,100]           |                                                           |         |                                                       |         |
| 2 <sup>nd</sup> tertile [29.6 ; 31.9] (medium)                    | 109/2,407 (4.5) | 0(0-0), [0-12,960]           |                                                           |         |                                                       |         |
| 3 <sup>rd</sup> tertile [31.9 ; 32.8] (high)                      | 19/1,630 (1.2)  | 0(0-0), [0-3,624]            |                                                           |         |                                                       |         |
| MODIS Enhanced Vegetation Index (EVI) mean for 2018               | n =6,134        | 6,133                        | *                                                         |         | *                                                     |         |
| 1 <sup>st</sup> tertile [0.04 ; 0.2] (low)                        | 26/2,086 (1.2)  | (0-0), [0-9,840]             |                                                           |         |                                                       |         |
| 2 <sup>nd</sup> tertile [0.2 ; 0.3] (medium)                      | 35/2,061 (1.7)  | (0-0), [0-3,624]             |                                                           |         |                                                       |         |
| 3 <sup>rd</sup> tertile [0.3 ; 0.4] (high)                        | 138/1,987 (6.9) | (0-0), [0-12,960]            |                                                           |         |                                                       |         |
| MODIS normalized difference vegetation index (NDVI) mean for 2018 | n = 6,134       | 6,133                        | **                                                        | 0.007   | **                                                    |         |
| 1 <sup>st</sup> tertile [0.06 ; 0.3] (low)                        | 27/2,063 (1.3)  | (0-0), [0-9,840]             | Reference                                                 |         | Reference                                             |         |
| 2 <sup>nd</sup> tertile [0.3 ; 0.4] (medium)                      | 33/2,079 (1.6)  | (0-0), [0-3,624]             | 0.72 (0.33-1.56)                                          | 0.41    | 0.44 (0.12 - 1.61)                                    | 0.21    |
| 3 <sup>rd</sup> tertile [0.4 ; 0.6] (high)                        | 139/1,992 (7.0) | (0-0), [0-12,960]            | 2.00 (0.93-4.28)                                          | 0.07    | 3.31 (0.85 – 12.93)                                   | 0.08    |
| Aridity index                                                     | n total=6,134   | 6,133                        | *                                                         |         | *                                                     |         |
| 1 <sup>st</sup> tertile [0.59 ; 0.61] (low)                       | 81/2,083 (3.9)  | (0-0), [0-9,840]             |                                                           |         |                                                       |         |
| 2 <sup>nd</sup> tertile [0.61 ; 0.62] (medium)                    | 50/2,099 (2.4)  | (0-0), [0-8,064]             |                                                           |         |                                                       |         |
| 3 <sup>rd</sup> tertile [0.62 ; 0.65] (high)                      | 68/1,952 (3.5)  | (0-0), [0-12,960]            |                                                           |         |                                                       |         |

† Adjusted Generalized logistic mixed model estimating equations with exchangeable correlation structure.

§ 5,366 observations included in fully adjusted model.

‡ Adjusted zero-inflated negative binomial regression model, inflating for sex and age (1–4 years, 5–14 years, 15 years), with an exchangeable correlation matrix.



| <b>Variables</b> | <b>Prevalence</b> | <b>Intensity of infection</b>       | <b>Generalized Logistic Mixed Model Multivariate Analysis †§</b> | <b>Negative binomial regression Multivariate Analysis ‡♣</b> |
|------------------|-------------------|-------------------------------------|------------------------------------------------------------------|--------------------------------------------------------------|
|                  | <b>n (%)</b>      | <b>median (IQR), [min, max] epg</b> | <b>Adjusted Odds Ratio (95%CI)</b>                               | <b>Adjusted Infection Intensity Ratio (95%CI)</b>            |
|                  |                   |                                     | <b>p-value</b>                                                   | <b>p-value</b>                                               |

♣ 5,364 observations included in fully adjusted model.

\* Variable dropped from fully adjusted model during model adjustment process using lowest AIC criteria.

\*\* Variable in the final adjusted model but with no significant category

Abbreviation: School Aged Children (SAC), Pre School Aged Children (PSAC), confidence interval (CI), interquartile range (IQR), Moderate Resolution Imaging Spectroradiometer (MODIS)

**Table 4** : Factors associated with *Ascaris* infection prevalence in Comé, Bénin: findings from a baseline prevalence survey using Kato-Katz technique

| Variables                                 |  <b>Ascaris Infection</b><br>n infected (%) | Univariate Analysis<br>Odds Ratio (95% CI) | p-value | Multivariate Analysis<br>Adjusted Odds Ratio<br>(95%CI) | p-value |
|-------------------------------------------|------------------------------------------------------------------------------------------------------------------------------|--------------------------------------------|---------|---------------------------------------------------------|---------|
| <b>INDIVIDUAL factors</b>                 |                                                                                                                              |                                            |         |                                                         |         |
| Age                                       | n = 6,139                                                                                                                    |                                            | 0.02    |                                                         |         |
| - Adults (≥15 years )                     | 62/3,620 (1.71)                                                                                                              | Reference                                  |         | Ref                                                     |         |
| - PreSAC (1-4 years)                      | 24/1,335 (2.03)                                                                                                              | 1.3 (0.7-2.2)                              | 0.42    | 1.6 (0.8-3.1)                                           | 0.14    |
| - SAC (5-14 years)                        | 40/1,184 (3.00)                                                                                                              | 2.0 (1.2-3.3)                              | 0.005   | 2.0 (1.1-3.6)                                           | 0.01    |
| Gender                                    | n = 6,139                                                                                                                    |                                            |         |                                                         |         |
| - Male                                    | 74/2,828 (2.62)                                                                                                              | Reference                                  |         |                                                         |         |
| - Female                                  | 52/3,311 (1.57)                                                                                                              | 0.5 (0.3-0.8)                              | 0.003   | 0.5 (0.3-0.9)                                           | 0.02    |
| History of deworming during the past year | n = 6,091                                                                                                                    |                                            |         | *                                                       |         |
| - No                                      | 98/3,687 (2.66)                                                                                                              | Reference                                  |         |                                                         |         |
| - Yes                                     | 28/2,404 (1.16)                                                                                                              | 0.7 (0.4-1.2)                              | 0.24    |                                                         |         |
| Shoe wearing behavior                     | n = 6,091                                                                                                                    |                                            |         | *                                                       |         |
| - Shoes                                   | 53/3,348 (1.58)                                                                                                              | Reference                                  |         |                                                         |         |
| - No shoes                                | 73/2,743 (2.66)                                                                                                              | 0.8 (0.5-1.3)                              | 0.41    |                                                         |         |
| Current school attendance                 | n = 6,139                                                                                                                    |                                            |         | **                                                      |         |
| - No                                      | 72/4,294 (1.68)                                                                                                              | Reference                                  |         |                                                         |         |
| - Yes                                     | 54/1,845 (2.93)                                                                                                              | 2.0 (1.3-3.0)                              | 0.001   |                                                         |         |
| <b>HOUSEHOLD factors</b>                  |                                                                                                                              |                                            |         |                                                         |         |
| Highest education level in the household  | n = 6,139                                                                                                                    |                                            | 0.08    | **                                                      |         |
| - University/College/Diploma              | 3/698 (0.43)                                                                                                                 | Reference                                  |         |                                                         |         |
| - No education                            | 41/1,942 (2.11)                                                                                                              | 2.4 (0.6-9.0)                              | 0.21    |                                                         |         |
| - Primary                                 | 45/1,341 (3.36)                                                                                                              | 4.2 (1.1- 16.6)                            | 0.04    |                                                         |         |
| - Secondary                               | 37/2,158 (1.71)                                                                                                              | 3.1 (0.8-11.9)                             | 0.10    |                                                         |         |
| Quintiles of household asset index        | n = 6,139                                                                                                                    |                                            | 0.14    | **                                                      |         |
| - 5th quintile (richest)                  | 13/1,558 (0.83)                                                                                                              | Reference                                  |         |                                                         |         |
| - 1st quintile (poorest)                  | 43/985 (4.37)                                                                                                                | 1.8 (0.8- 4.1)                             | 0.15    |                                                         |         |
| - 2nd quintile                            | 30/1,043 (2.88)                                                                                                              | 1.7 (0.7- 3.9)                             | 0.21    |                                                         |         |
| - 3rd quintile                            | 22/1,175 (1.87)                                                                                                              | 0.9 (0.4-2.0)                              | 0.72    |                                                         |         |

| Variables                                       | Ascaris Infection<br>n infected (%) | Univariate Analysis<br>Odds Ratio (95% CI) | p-value      | Multivariate Analysis<br>Adjusted Odds Ratio<br>(95%CI) | p-value |
|-------------------------------------------------|-------------------------------------|--------------------------------------------|--------------|---------------------------------------------------------|---------|
| - 4th quintile                                  | 18/1,378 (1.31)                     | 0.9 (0.4-2.3)                              | 0.94         |                                                         |         |
| <b>Head of household's occupation</b>           | <b>n = 6,139</b>                    |                                            | <b>0.21</b>  | <b>*</b>                                                |         |
| - Others/ Don't know/Refused                    | 62/4,618 (1.34)                     | Reference                                  |              |                                                         |         |
| - Farmer                                        | 13/921 (1.41)                       | 0.9 (0.4-1.9)                              | 0.86         |                                                         |         |
| - Fisher                                        | 51/600 (8.50)                       | 1.6 (0.9-2.6)                              | 0.10         |                                                         |         |
| <b>Observed floor type : natural/manmade</b>    | <b>n = 6,139</b>                    |                                            | <b>0.99</b>  | <b>*</b>                                                |         |
| - Man-made floor material                       | 97/5,162 (1.88)                     | Reference                                  |              |                                                         |         |
| - Natural floor material                        | 29/950 (3.05)                       | 1.0 (0.6-1.7)                              | 0.99         |                                                         |         |
| - Other/Don't know/Refused                      | 1/27 (3.7)                          | -                                          | -            |                                                         |         |
| <b>Urbanization</b>                             | <b>n = 6,134</b>                    |                                            | <b>0.26</b>  | <b>*</b>                                                |         |
| - Urban                                         | 69/2,418 (2.85)                     | Reference                                  |              |                                                         |         |
| - Peri-urban                                    | 14/2,922 (0.48)                     | 0.4 (0.1-1.2)                              | 0.11         |                                                         |         |
| - Rural                                         | 43/794 (5.42)                       | 0.8 (0.5-1.4)                              | 0.51         |                                                         |         |
| <b>3 tertiles of population density at 1km</b>  | <b>n = 6,134</b>                    |                                            | <b>0.005</b> | <b>*</b>                                                |         |
| - 1 <sup>st</sup> tertile [3 ; 542[ (low)       | 19/2,021 (0.94)                     | Reference                                  |              |                                                         |         |
| - 2 <sup>nd</sup> tertile [542 ; 1235[ (medium) | 57/2,072 (2.75)                     | 1.6 (0.8-3.0)                              | 0.14         |                                                         |         |
| - 3 <sup>rd</sup> tertile [ 1235 ; 2528] (high) | 50/2,041 (2.45)                     | 2.9 (1.5-5.9)                              | 0.002        |                                                         |         |
| <b>WASH factors</b>                             |                                     |                                            |              |                                                         |         |
| <b>Household water SDG service modified</b>     | <b>n = 6,063</b>                    |                                            | <b>0.97</b>  | <b>*</b>                                                |         |
| - Improved ≤ 30min                              | 107/5,098 (2.10)                    | Reference                                  |              |                                                         |         |
| - Surface water > 30min                         | 0/3 (0.0)                           | 1                                          |              |                                                         |         |
| - Surface water ≤ 30min                         | 0/16 (0.0)                          | 1                                          |              |                                                         |         |
| - Unimproved > 30min                            | 0/53 (0.0)                          | 1                                          |              |                                                         |         |
| - Unimproved ≤ 30min                            | 8/583 (1.37)                        | 1.1 (0.4-2.7)                              | 0.85         |                                                         |         |
| - Improved > 30 min                             | 11/382 (2.88)                       | 1.1 (0.5-2.4)                              | 0.84         |                                                         |         |
| -                                               |                                     |                                            |              |                                                         |         |
| <b>Household sanitation SDG service</b>         | <b>n = 5,816</b>                    |                                            | <b>0.65</b>  | <b>**</b>                                               |         |
| - Open defecation                               | 84/2,162 (3.89)                     | Reference                                  |              | Ref                                                     |         |
| - Unimproved shared                             | 5/227 (2.20)                        | 1.3 (0.4-4.3)                              | 0.65         | 1.6 (0.4 - 6.8)                                         | 0.51    |
| - Unimproved unshared                           | 2/127 (1.57)                        | 1.2 (0.2-6.9)                              | 0.84         | 1.1 (0.1 – 11.5)                                        | 0.94    |
| - Improved shared                               | 23/1,666 (1.38)                     | 0.9 (0.5-1.7)                              | 0.74         | 1.1 (0.5 – 2.1)                                         | 0.87    |
| - Improved unshared                             | 11/1,634 (0.67)                     | 0.6 (0.3-1.2)                              | 0.16         | 0.8 (0.3 – 1.8)                                         | 0.55    |

| Variables                                                       | Ascaris Infection<br>n infected (%) | Univariate Analysis<br>Odds Ratio (95% CI) | p-value | Multivariate Analysis<br>Adjusted Odds Ratio<br>(95%CI) | p-value |
|-----------------------------------------------------------------|-------------------------------------|--------------------------------------------|---------|---------------------------------------------------------|---------|
| Household Hand washing facility SDG service                     | n = 5,716                           |                                            | 0.09    | **                                                      |         |
| - No facility                                                   | 13/1,881 (1.80)                     | Reference                                  |         | Ref                                                     |         |
| - Limited                                                       | 16/3,111 (0.85)                     | 2.6 (1.2-5.6)                              | 0.01    | 1.8 (0.8 – 3.6)                                         | 0.13    |
| - Basic                                                         | 71/724 (2.28)                       | 1.9 (0.7-4.8)                              | 0.20    | 1.3 (0.5 – 3.4)                                         | 0.54    |
| <b>ENVIRONMENTAL Factors</b>                                    |                                     |                                            |         |                                                         |         |
| Elevation (in meters)                                           | n = 6,134                           |                                            | 0.02    | *                                                       |         |
| 1 <sup>st</sup> tertile [-1 ; 15[ (low)                         | 88/2,094 (4.20)                     | Reference                                  |         |                                                         |         |
| 2 <sup>nd</sup> tertile [15 ; 30[ (medium)                      | 25/2,300 (1.09)                     | 0.6 (0.3-1.2)                              | 0.17    |                                                         |         |
| 3 <sup>rd</sup> tertile [30 ; 61] (high)                        | 13/1,740 (0.75)                     | 0.3 (0.1-0.7)                              | 0.01    |                                                         |         |
| Proportion of soil that is sand at the surface at 0 cm (%)      | n = 6,134                           |                                            | 0.09    | *                                                       |         |
| 1 <sup>st</sup> tertile [35 ; 55[ (low)                         | 101/2,143( 4.71)                    | Reference                                  |         |                                                         |         |
| 2 <sup>nd</sup> tertile [55 ; 64[ (medium)                      | 9/2,001 (0.45)                      | 0.5 (0.2-1.1)                              | 0.10    |                                                         |         |
| 3 <sup>rd</sup> tertile [64 ; 78] (high)                        | 16/1,990 (0.80)                     | 0.5 (0.2-1.1)                              | 0.07    |                                                         |         |
| Soil acidity (pH KCL) at average depth (0-5-15 cm)              | n = 6,134                           |                                            | 0.001   |                                                         |         |
| 1 <sup>st</sup> tertile [4.8 ; 5.1[ (low)                       | 14/2,810 (0.69)                     | Reference                                  |         | Ref                                                     |         |
| 2 <sup>nd</sup> tertile [5.1 ; 5.2[ (medium)                    | 29/1,230 (1.31)                     | 2.2 (1.0-5.0)                              | 0.06    | 2.0 (0.9-4.2)                                           | 0.20    |
| 3 <sup>rd</sup> tertile [5.2 ; 5.7] (high)                      | 83/2,094 (4.42)                     | 4.1 (1.9-8.8)                              | 0.001   | 4.8 (1.8-13.1)                                          | 0.002   |
| MODIS daytime land surface temperature mean for 2018 (°celsius) | n = 6,134                           |                                            | 0.001   |                                                         |         |
| 1 <sup>st</sup> tertile [26.2 ; 29.6[ (low)                     | 115/2,097 (5.48)                    | Reference                                  |         |                                                         |         |
| 2 <sup>nd</sup> tertile [29.6 ; 31.9[ (medium)                  | 7/2,407 (0.29)                      | 0.1 (0.03-0.4)                             | 0.001   | 0.12 (0.03-0.44)                                        | 0.001   |
| 3 <sup>rd</sup> tertile [31.9 ; 32.8] (high)                    | 4/1,630 ( 0.25)                     | 0.1 (0.02-0.5)                             | 0.005   | 0.17 (0.03-0.91)                                        | 0.038   |
| MODIS Enhanced Vegetation Index (EVI) mean for 2018             | n = 6,134                           |                                            | 0.36    | *                                                       |         |
| 1 <sup>st</sup> tertile [0.04 ; 0.2[ (low)                      | 20/2,086 (0.96)                     | Reference                                  |         |                                                         |         |
| 2 <sup>nd</sup> tertile [0.2 ; 0.3[ (medium)                    | 67/2,061 (3.25)                     | 1.1 (0.5-2.4)                              | 0.72    |                                                         |         |
| 3 <sup>rd</sup> tertile [0.3 ; 0.4] (high)                      | 39/1,987 (1.96)                     | 0.8 (0.3-1.8)                              | 0.54    |                                                         |         |

| Variables                                                               | Ascaris Infection<br>n infected (%) | Univariate Analysis<br>Odds Ratio (95% CI) | p-value | Multivariate Analysis<br>Adjusted Odds Ratio<br>(95%CI) | p-value |
|-------------------------------------------------------------------------|-------------------------------------|--------------------------------------------|---------|---------------------------------------------------------|---------|
| MODIS normalized difference<br>vegetation index (NDVI) mean for<br>2018 | n = 6,134                           |                                            | 0.90    | *                                                       |         |
| 1 <sup>st</sup> tertile [0.06 ; 0.3[ (low)                              | 22/2,063 (1.07)                     | Reference                                  |         |                                                         |         |
| 2 <sup>nd</sup> tertile [0.3 ; 0.4[ (medium)                            | 65/2,079 (3.13)                     | 1.1 (0.5-2.1)                              | 0.86    |                                                         |         |
| 3 <sup>rd</sup> tertile [0.4 ; 0.6] (high)                              | 39/1,992 (1.96)                     | 0.9 (0.4-2.0)                              | 0.87    |                                                         |         |
| Aridity index                                                           | n = 6,134                           |                                            | 0.54    | *                                                       |         |
| 1 <sup>st</sup> tertile [0.59 ; 0.61[ (low)                             | 15/2,083 (0.72)                     | Reference                                  |         |                                                         |         |
| 2 <sup>nd</sup> tertile [0.61 ; 0.62[ (medium)                          | 92/2,099 (4.38)                     | 0.6 (0.2-1.6)                              | 0.33    |                                                         |         |
| 3 <sup>rd</sup> tertile [0.65 ; 0.65] (high)                            | 19/1,962 (0.97)                     | 1.0 (0.3-3.3)                              | 0.96    |                                                         |         |

\* Variable dropped from fully adjusted model during model adjustment process using lowest AIC criteria.

\*\* Variable in the final adjusted model but with no significant category

Abbreviation: School Aged Children (SAC), Pre School Aged Children (PSAC), confidence interval (CI), interquartile range (IQR), Moderate Resolution Imaging Spectroradiometer (MODIS)



|                    |
|--------------------|
| SUPPLEMENTARY DATA |
|--------------------|

**Table S1:** Burden of moderate to high intensity (MHI) STH infection in the study population by age group, during DeWorm3 baseline analysis in Comé, Bénin

| Age group        | N<br>=6,139 | MHI STH   | MHI<br>Hookworm | MHI Ascaris | MHI<br>Trichuris |
|------------------|-------------|-----------|-----------------|-------------|------------------|
| - Adults (≥15 y) | 3,620       | 24 (0.7%) | 7 (0.2)         | 17 (0.5%)   | 0                |
| - PSAC (1-4 y)   | 1,335       | 14 (1.1%) | 1 (0.1%)        | 13 (1.0%)   | 0                |
| - SAC (5-14 y)   | 1,184       | 28 (2.3%) | 2 (0.2%)        | 25 (2.1%)   | 1 (0.0)          |

SUPPLEMENTARY DATA

**Table S2:** Burden of moderate to high STH infection in infected individuals by age group and gender, during DeWorm3 baseline analysis in Comé, Bénin

|        | N=66   | Hookworm  | Ascaris   | Trichuris | Total (%) |
|--------|--------|-----------|-----------|-----------|-----------|
| PSAC   | Male   | 1         | 5         | -         | 6 (9)     |
|        | Female | -         | 8         | -         | 8 (12.1)  |
| SAC    | Male   | 2         | 20        | 1         | 23 (34.8) |
|        | Female | -         | 5         | -         | 5 (7.5)   |
| Adults | Male   | 4         | 12        | -         | 16 (24.2) |
|        | Female | 3         | 5         | -         | 8 (12.1)  |
| Total  |        | 10 (15.1) | 55 (83.3) | 1(1.5)    | 66 (100)  |



SUPPLEMENTARY DATA

**Table S3:** Factors univariately associated with hookworm infection in Comé, Bénin: findings from DeWorm3 cluster randomized trial baseline pre-treatment survey using generalized logistic mixed model.

| Variables                                    |  Infected by<br>hookworms<br>n (%) | Intensity of<br>hookworm infection<br>Median (IQR), [min,<br>max] epg | Factors associated with prevalence<br>of hookworm infection |         | Factors associated with intensity of<br>hookworm infection |         |
|----------------------------------------------|---------------------------------------------------------------------------------------------------------------------|-----------------------------------------------------------------------|-------------------------------------------------------------|---------|------------------------------------------------------------|---------|
|                                              |                                                                                                                     |                                                                       | Univariate Logistic<br>regression Analysis<br>OR (95% CI)   | p-value | Univariate negative<br>binomial analysis<br>IIR (95% CI)   | p-value |
| <b>Individual factors</b>                    |                                                                                                                     |                                                                       |                                                             |         |                                                            |         |
| Age                                          | n =6,139                                                                                                            | n=6,138                                                               |                                                             | <0.001  |                                                            | <0.0001 |
| - Adults (≥15 years )                        | 160/3,620 (4.4)                                                                                                     | 0(0-0), [0-12,960]                                                    | Reference                                                   |         | Reference                                                  |         |
| - PSAC (1-4 years)                           | 27/1,335 (2.0)                                                                                                      | 0 (0-0), [0-3,552]                                                    | 0.15 (0.07-0.31)                                            | <0.001  | 0.04 (0.01 -0.13)                                          | <0.001  |
| - SAC (5-14 years)                           | 12/1,184 (1.0)                                                                                                      | 0 (0-0), [0-11,100]                                                   | 0.35 (0.20-0.59)                                            | <0.001  | 0.13 (0.05-0.33)                                           | <0.001  |
| Gender                                       | n total=6,139                                                                                                       | n=6,138                                                               |                                                             | 0.002   |                                                            | 0.0003  |
| - Male                                       | 113/2,828 (4.0)                                                                                                     | 0 (0-0), [0-12,960]                                                   | Reference                                                   |         | Reference                                                  |         |
| - Female                                     | 86/3,311 (2.6)                                                                                                      | 0 (0-0), [0-9,840]                                                    | 0.57 (0.40-0.82)                                            | 0.002   | 0.29 (0.15-0.57)                                           | <0.001  |
| History of deworming during<br>the past year | n total=6,091                                                                                                       | n=6,090                                                               |                                                             | <0.001  |                                                            | <0.0001 |
| - No                                         | 171/3,687 (4.6)                                                                                                     | 0 (0-0), [0-12,960]                                                   | Reference                                                   |         | Reference                                                  |         |
| - Yes                                        | 28/2,404 (1.2)                                                                                                      | 0 (0-0), [0-3,048]                                                    | 0.22 (0.13-0.37)                                            | <0.001  | 0.05 (0.02-0.12)                                           | <0.001  |
| Shoe wearing behavior                        | n =6,091                                                                                                            | n=6,090                                                               |                                                             | 0.85    |                                                            | 0.96    |
| - Shoes                                      | 100/3,348 (3.0)                                                                                                     | 0 (0-0), [0-12,960]                                                   | Reference                                                   |         | Reference                                                  |         |

|                                          |                 |                     |                   |         |                      |         |
|------------------------------------------|-----------------|---------------------|-------------------|---------|----------------------|---------|
| - No shoes                               | 99/2,743 (3.6)  | 0 (0-0), [0-11,100] | 1.03 (0.72-1.48)  | 0.85    | 0.98 (0.50-1.94)     | 0.96    |
| Current school attendance                | n =6,139        | n=6,138             |                   | 0.29    |                      | 0.18    |
| - No                                     | 152/4,294 (3.5) | 0(0-0), [0-12,960]  | Reference         |         | Reference            |         |
| - Yes                                    | 47/1,845 (2.5)  | 0(0-0), [0-11,100]  | 0.80 (0.53-1.21)  | 0.29    | 0.60 (0.28-1.26)     | 0.18    |
| <b>Household factors</b>                 |                 |                     |                   |         |                      |         |
| Highest education level in the household | n =6,139        | n=6,138             |                   | 0.002   |                      | 0.0015  |
| - University/College/Diploma             | 4/698 (0.6)     | 0(0-0), [0-228]     | Reference         |         | Reference            |         |
| - No education                           | 93/1,942 (4.8)  | 0(0-0), [0-12,960]  | 6.8 (2.21-20.86)  | 0.001   | 39.68 (5.64-279.16)  | <0.001  |
| - Primary                                | 50/1,341 (3.7)  | 0(0-0), [0-11,100]  | 5.0 (1.60-15.60)  | 0.006   | 26.57 (3.68-191.56)  | 0.001   |
| - Secondary                              | 52/2,158 (2.4)  | 0(0-0), [0-4,764]   | 3.66 (1.20-11.18) | 0.023   | 15.87 (2.31-108.97)  | 0.005   |
| Quintiles of household asset index       | n =6,139        | n=6,138             |                   | <0.001  |                      | <0.0001 |
| - 5th quintile (high)                    | 16/1,558 (1.0)  | 0(0-0), [0-1,440]   | Reference         |         | Reference            |         |
| - 1st quintile (low)                     | 76/985 (7.7)    | 0(0-0), [0-12,960]  | 7.14 (3.45-14.78) | <0.001  | 53.53 (15.18-188.83) | <0.001  |
| - 2nd quintile                           | 51/1,043 (4.9)  | 0(0-0), [0-4,764]   | 4.85 (2.38-9.90)  | <0.001  | 22.03 (6.35-76.43)   | <0.001  |
| - 3rd quintile                           | 38/1,175 (3.2)  | 0(0-0) [0-9,840]    | 2.84 (1.41-5.70)  | 0.003   | 7.10 (2.09-24.07)    | 0.002   |
| - 4th quintile                           | 18/1,378 (1.3)  | 0(0-0), [0-1,104]   | 1.19 (0.55-2.54)  | 0.66    | 1.32 (0.36-4.80)     | 0.67    |
| Head of household's occupation           | n =6,139        | n=6,138             |                   | <0.0001 |                      | <0.0001 |
| - Others/ Don't know/Refused             | 98/4,618 (2.1)  | 0(0-0), [0-4,764]   | Reference         |         | Reference            |         |

|                                          |                 |                    |                     |         |                      |         |
|------------------------------------------|-----------------|--------------------|---------------------|---------|----------------------|---------|
| - Farmer                                 | 89/921 (9.7)    | 0(0-0), [0-12,960] | 3.64 (2.21-5.97)    | <0.001  | 18.10 (7.39-44.32)   | <0.001  |
| - Fisher                                 | 12/600 (2.0)    | 0(0-0), [0-516]    | 1.17 (0.54-2.54)    | 0.69    | 0.72 (0.17-3.14)     | 0.67    |
| Observed floor type :<br>natural/manmade | n =6,139        | n=6,138            |                     | <0.0001 |                      | <0.0001 |
| - Man-made floor material                | 123/5,162 (2.4) | 0(0-0), [0-11,100] | Reference           |         | Reference            |         |
| - Natural floor material                 | 75/950 (7.9)    | 0(0-0),[0-12,960]  | 2.90 (1.86-4.53)    | <0.001  | 11.49 (5.13-25.72)   | <0.001  |
| - Other/Don't<br>know/Refused            | 1/27 (3.7)      | 0(0-0), [0-48]     | 2.94 (0.24-35.64)   | 0.40    | 4.92 (0.02-1068.60)  | 0.562   |
| Urbanization                             | n =6,134        | n=6,133            |                     | <0.0001 |                      | <0.0001 |
| - Urban                                  | 29/2,418 (1.2)  | 0(0-0), [0-9,840]  | Reference           |         | Reference            |         |
| - Peri-urban                             | 146/2,922 (5.0) | 0(0-0), [0-12,960] | 4.34 (2.30-8.20)    | <0.0001 | 22.47 (7.15-70.65)   | <0.001  |
| - Rural                                  | 24/794 (3.0)    | 0(0-0), [0-3,120]  | 2.67 (1.09-6.57)    | 0.03    | 6.35 (1.23-32.75)    | 0.03    |
| Population density at 1km                | n =6,134        | n=6,133            |                     | <0.0001 |                      | <0.0001 |
| 1 <sup>st</sup> tertile [3 ; 542[        | 135/2,021 (6.7) | 0(0-0) [0-12,960]  | Reference           |         | Reference            |         |
| 2 <sup>nd</sup> tertile [542 ; 1235[     | 43/2,072 (2.1)  | 0(0-0), [0-3,624]  | 0.39 (0.23-0.69)    | 0.001   | 0.15 (0.05-0.42)     | <0.001  |
| 3 <sup>rd</sup> tertile [ 1235 ; 2528]   | 21/2,041 (1.0)  | 0(0-0), [0-9,840]  | 0.15 (0.73-0.32)    | < 0.001 | 0.02 (0.005-0.07)    | <0.001  |
| <b>WASH factors</b>                      |                 |                    |                     |         |                      |         |
| Household water service                  | n =6,135        | n=6,134            |                     | 0.001   |                      | -       |
| - Improved ≤ 30min                       | 141/5,098 (2.8) | 0 (0-0),[0-2,124]  | Reference           |         | Reference            |         |
| - Surface water > 30min                  | 0/3 (0.0)       | 0(0-0), [0-3120]   | 0                   | -       | 0                    | -       |
| - Surface water ≤ 30min                  | 2/16 (12.5)     | 0(0-0), [0-120]    | 11.14 (1.20-103.68) | 0.034   | 75.75 (1.31-4390.32) | 0.04    |

|                                               |                 |                    |                   |        |                      |         |
|-----------------------------------------------|-----------------|--------------------|-------------------|--------|----------------------|---------|
| - Unimproved > 30min                          | 6/53 (11.3)     | 0(0-0), [0-696]    | 5.77 (1.58-21.08) | 0.008  | 97.66 (8.79-1085.16) | <0.001  |
| - Unimproved ≤ 30min                          | 39/583 (6.7)    | 0(0-0), [0-2,124]  | 2.72 (1.54-4.81)  | 0.001  | 10.70 (3.91-29.27)   | <0.001  |
| - Improved > 30 min                           | 11/382 (2.9)    | 0(0-0), [0-3,120]  | 0.96 (0.43-2.13)  | 0.914  | 0.95 (0.22-4.09)     | 0.95    |
| Household sanitation service                  | n =5,816        | n=5,815            |                   | 0.0001 |                      | <0.0001 |
| - Open defecation                             | 129/2,162 (6.0) | 0(0-0), [0-12,960] | Reference         | 0.044  | Reference            |         |
| - Unimproved shared                           | 3/227 (1.3)     | 0(0-0), [0-60]     | 0.24 (0.06-0.96)  | 0.064  | 0.03 (0.002-0.39)    | 0.01    |
| - Unimproved unshared                         | 1 /127(0.8)     | 0(0-0), [0-204]    | 0.12 (0.01-1.13)  | <0.001 | 0.02 (0.0006-0.54)   | 0.02    |
| - Improved shared                             | 28/1,666 (1.7)  | 0(0-0), [50-9,840] | 0.29 (0.16-0.54)  | <0.001 | 0.08 (0.03-0.23)     | <0.001  |
| - Improved unshared                           | 28/1,634 (1.7)  | 0(0-0), [0-1,440]  | 0.28 (0.15-0.52)  | 0.1705 | 0.07 (0.02-0.20)     | <0.001  |
| Household hand washing facility service       | n = 5,716       | n=5,715            |                   |        |                      | 0.007   |
| - No facility                                 | 64/1,881 (3.4)  | 0(0-0), [0-12,960] | Reference         |        | Reference            |         |
| - Limited                                     | 104/3,111 (3.3) | 0(0-0), [0-8,064]  | 1.18 (0.76-1.83)  | 0.452  | 1.30 (0.59-2.86)     | 0.51    |
| - Basic                                       | 13/724 (1.8)    | 0(0-0), [0-1,440]  | 0.58 (0.27-1.25)  | 0.167  | 0.30 (0.08-1.16)     | 0.08    |
| <b>Environmental Factors</b>                  |                 |                    |                   |        |                      |         |
| Elevation (in meters)                         | n = 6,134       | 6,133              |                   | 0.02   |                      | 0.003   |
| 1 <sup>st</sup> tertile [-1 ; 15[             | 63/2,094 (3.0)  | 0(0-0), [0-12,960] | Reference         |        | Reference            |         |
| 2 <sup>nd</sup> tertile [15 ; 30[             | 37/2,300 (1.6)  | 0(0-0), [0-9,840]  | 0.45 (0.24-0.86)  | 0.02   | 0.17 (0.05-0.54)     | 0.003   |
| 3 <sup>rd</sup> tertile [30 ; 61]             | 99/1,740 (5.7)  | 0(0-0), [0-11,100] | 0.99 (0.54-1.81)  | 0.97   | 0.86 (0.28-2.62)     | 0.79    |
| Soil sand fraction at the surface at 0 cm (%) | n total=6,134   | 6,133              |                   | 0.01   |                      | 0.001   |

|                                                                   |                 |                    |                   |          |                      |         |
|-------------------------------------------------------------------|-----------------|--------------------|-------------------|----------|----------------------|---------|
| 1 <sup>st</sup> tertile [35 ; 55[                                 | 37/2,143 (1.7)  | 0(0-0), [0-1,176]  | Reference         |          | Reference            |         |
| 2 <sup>nd</sup> tertile [55 ; 64[                                 | 40/2,001 (2.0)  | 0(0-0), [0-3,624]  | 1.14 (0.61-2.12)  | 0.67     | 1.50 (0.49-4.61)     | 0.48    |
| 3 <sup>rd</sup> tertile [64 ; 78]                                 | 122/1,990 (6.1) | 0(0-0), [0-12,960] | 2.45 (1.29-4.66)  | 0.006    | 8.60 (2.53-29.19)    | 0.001   |
| Soil acidity at average depth (0-5-15 cm)                         | n total= 6,134  | 6,133              |                   | 0.0351   |                      | 0.018   |
| 1 <sup>st</sup> tertile [4.8 ; 5.1[                               | 40/2,810 (2.0)  | 0(0-0), [0-11,100] | Reference         |          | Reference            |         |
| 2 <sup>nd</sup> tertile [5.1 ; 5.2[                               | 90/1,230 (4.0)  | 0(0-0), [0-9,840]  | 1.93 (1.15-3.24)  | 0.01     | 3.47 (1.32-9.16)     | 0.012   |
| 3 <sup>rd</sup> tertile [5.2 ; 5.7]                               | 69/2,094 (3.7)  | 0(0-0), [0-12,960] | 1.86 (1.06-3.25)  | 0.03     | 4.04 (1.42-11.49)    | 0.009   |
| MODIS daytime land surface temperature mean for 2018 (°celsius)   | n = 6,134       | 6,133              |                   | 0.0082   |                      | 0.0002  |
| 1 <sup>st</sup> tertile [26.2 ; 29.6[                             | 71/2,097 (3.4)  | 0(0-0), [0-11,100] | Reference         |          | Reference            |         |
| 2 <sup>nd</sup> tertile [29.6 ; 31.9[                             | 109/2,407 (4.5) | 0(0-0), [0-12,960] | 1.25 (0.72-2.16)  | 0.43     | 2.68 (0.97-7.41)     | 0.057   |
| 3 <sup>rd</sup> tertile [31.9 ; 32.8]                             | 19/1,630 (1.2)  | 0(0-0), [0-3,624]  | 0.34 (0.14-0.82)  | 0.02     | 0.12 (0.02-0.64)     | 0.013   |
| MODIS Enhanced Vegetation Index (EVI) mean for 2018               | n =6,134        | 6,133              |                   | < 0.0001 |                      | <0.0001 |
| 1 <sup>st</sup> tertile [0.04 ; 0.2[                              | 26/2,086 (1.2)  | (0-0), [0-9,840]   | Reference         |          | Reference            |         |
| 2 <sup>nd</sup> tertile [0.2 ; 0.3[                               | 35/2,061 (1.7)  | (0-0), [0-3,624]   | 1.42 (0.74-2.72)  | 0.29     | 2.23 (0.70-7.08)     | 0.174   |
| 3 <sup>rd</sup> tertile [0.3 ; 0.4]                               | 138/1,987 (6.9) | (0-0), [0-12,960]  | 5.22 (2.61-10.45) | < 0.001  | 42.41 (11.88-151.44) | <0.001  |
| MODIS normalized difference vegetation index (NDVI) mean for 2018 | n = 6,134       | 6,133              |                   | < 0.0001 |                      | <0.0001 |
| 1 <sup>st</sup> tertile [0.06 ; 0.3[                              | 27/2,063 (1.3)  | (0-0), [0-9,840]   | Reference         |          | Reference            |         |
| 2 <sup>nd</sup> tertile [0.3 ; 0.4[                               | 33/2,079 (1.6)  | (0-0), [0-3,624]   | 1.20 (0.63-2.29)  | 0.57     | 1.56 (0.50-4.88)     | 0.443   |

|                                       |                 |                   |                  |         |                      |        |
|---------------------------------------|-----------------|-------------------|------------------|---------|----------------------|--------|
| 3 <sup>rd</sup> tertile [0.4 ; 0.6]   | 139/1,992 (7.0) | (0-0), [0-12,960] | 4.94 (2.50-9.76) | < 0.001 | 36.18 (10.25-127.67) | <0.001 |
| Aridity index                         | n total=6,134   | 6,133             |                  | 0.28    |                      | 0.0977 |
| 1 <sup>st</sup> tertile [0.59 ; 0.61[ | 81/2,083 (3.9)  | (0-0), [0-9,840]  | Reference        |         | Reference            |        |
| 2 <sup>nd</sup> tertile [0.61 ; 0.62[ | 50/2,099 (2.4)  | (0-0), [0-8,064]  | 1.22 (0.61-2.43) | 0.57    | 1.11 (0.30-4.20)     | 0.872  |
| 3 <sup>rd</sup> tertile [0.65 ; 0.65] | 68/1,952 (3.5)  | (0-0), [0-12,960] | 1.84 (0.84-4.00) | 0.12    | 3.64 (0.89-14.83)    | 0.071  |

†Generalized estimating equations with exchangeable correlation structure and logit link applied

All data available displayed for "Infected with Hookworm/ total N (%)"

Acronyms: School Aged Children (SAC), Pre School Aged Children (PSAC) , confidence interval (CI), odds ratio (OR), Moderate Resolution Imaging Spectroradiometer (MODIS)



|                    |
|--------------------|
| SUPPLEMENTARY DATA |
|--------------------|

Table S4 : Intra-Class Correlation values

| Risk factor analysis                                                                                                                                                                                                                                                                                                                                                                                                                                                                                                                                                                                                                                                                | Model                  | Level of clustering            | Intra-Class Correlation (95% IC)* |
|-------------------------------------------------------------------------------------------------------------------------------------------------------------------------------------------------------------------------------------------------------------------------------------------------------------------------------------------------------------------------------------------------------------------------------------------------------------------------------------------------------------------------------------------------------------------------------------------------------------------------------------------------------------------------------------|------------------------|--------------------------------|-----------------------------------|
| Hookworm prevalence**                                                                                                                                                                                                                                                                                                                                                                                                                                                                                                                                                                                                                                                               | Model with age and sex | Cluster level                  | 0.16 (0.10-0.26)                  |
|                                                                                                                                                                                                                                                                                                                                                                                                                                                                                                                                                                                                                                                                                     |                        | Household within Cluster level | 0.58 (0.40-0.74)                  |
|                                                                                                                                                                                                                                                                                                                                                                                                                                                                                                                                                                                                                                                                                     | Fully adjusted model   | Cluster level                  | 0.03 (0.01-0.10)                  |
|                                                                                                                                                                                                                                                                                                                                                                                                                                                                                                                                                                                                                                                                                     |                        | Household within Cluster level | 0.39 (0.18-0.65)                  |
|  <b>Ascaris lumbricoides</b> prevalence **                                                                                                                                                                                                                                                                                                                                                                                                                                                                                                                                                         | Model with age and sex | Cluster level                  | 0.54 (0.34-0.73)                  |
|                                                                                                                                                                                                                                                                                                                                                                                                                                                                                                                                                                                                                                                                                     |                        | Household within Cluster level | 0.60 (0.38-0.78)                  |
|                                                                                                                                                                                                                                                                                                                                                                                                                                                                                                                                                                                                                                                                                     | Fully adjusted model   | Cluster level                  | 0.42 (0.23-0.64)                  |
|                                                                                                                                                                                                                                                                                                                                                                                                                                                                                                                                                                                                                                                                                     |                        | Household within Cluster level | 0.51 (0.26-0.76)                  |
|  <p>*The Intraclass correlation statistics reports two intraclass correlations for this three-level nested model. The first is the level-3 intraclass correlation at the cluster level, the correlation between Hookworm or <i>Ascaris lumbricoides</i> infection prevalence in the same cluster. The second is the level-2 intraclass correlation at the household-within-cluster level, the correlation between prevalence of infection with <i>Ascaris lumbricoides</i> in the same household and cluster.</p> <p>** Generalized logistic mixed model with exchangeable correlation matrix</p> |                        |                                |                                   |
